# Supplementary material for: Proteomics approach to investigate dynamic protein profile involved in high fat diet-induced fatty liver disease in rats
Source: PubMed Central journal article supplement — J Toxicol Pathol. 2019 Mar 19;32(4):223–32. doi: 10.1293/tox.2018-0045 (PMC6831498; doi:10.1293/tox.2018-0045), 2019-03-19

Supplemental data

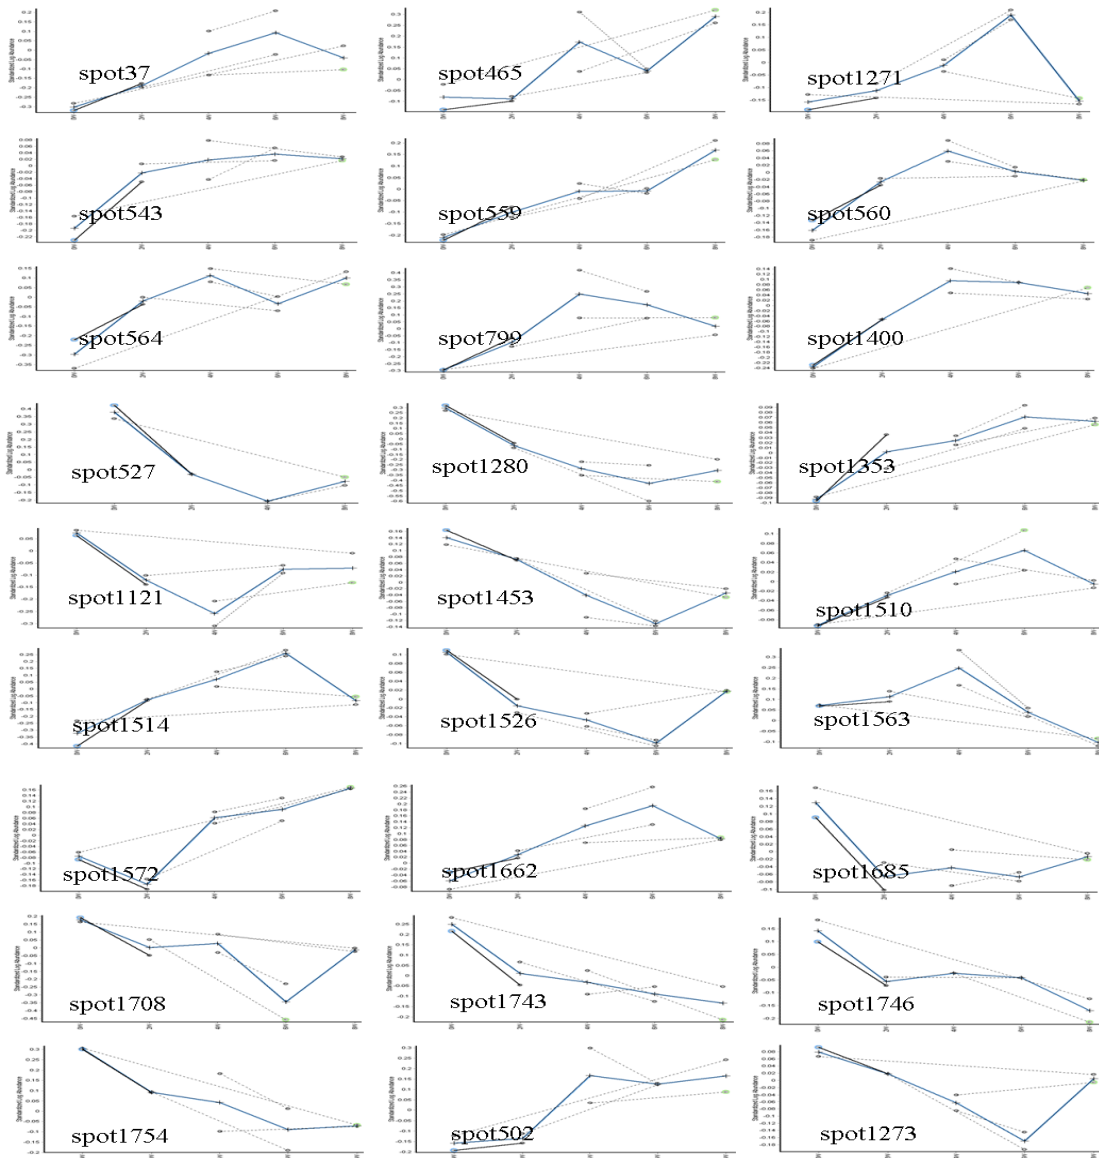

| Spot ID | Max      | Anova      | Wilcoxon | ratio>2 & Anova<0.05 |
|---------|----------|------------|----------|----------------------|
| 37      | 2.0789   | 0.0303203  | 0 1      | "1" "1" "1" "1"      |
| 465     | 3.8932   | 0.00104345 | 0 1      | "1" "1" "1" "1"      |
| 527     | -3.52332 | 0.0124988  | 0 1      | "1" "1" "1" "1"      |
| 543     | 2.87164  | 0.00150523 | 0 1      | "1" "1" "1" "1"      |
| 559     | 2.26754  | 0.023475   | 0 1      | "1" "1" "1" "1"      |
| 560     | 2.64349  | 2.31345e-4 | 0 1      | "1" "1" "1" "1"      |
| 564     | 2.47844  | 0.0463818  | 0 1      | "1" "1" "1" "1"      |
| 502     | 2.23441  | 0.0148328  | 0 1      | "1" "1" "1" "1"      |
| 799     | 2.29926  | 0.0166998  | 0 1      | "1" "1" "1" "1"      |
| 1121    | -2.39675 | 0.0231339  | 0 1      | "1" "1" "1" "1"      |
| 1271    | 3.02366  | 0.00121944 | 0 1      | "1" "1" "1" "1"      |
| 1273    | -2.4166  | 0.0024406  | 0 1      | "1" "1" "1" "1"      |

|      |          |            |   |   |     |     |     |     |
|------|----------|------------|---|---|-----|-----|-----|-----|
| 1280 | -2.2932  | 5.92003e-4 | 0 | 1 | "1" | "1" | "1" | "1" |
| 1353 | 2.02762  | 0.00764313 | 0 | 1 | "1" | "1" | "1" | "1" |
| 1400 | 2.20124  | 0.0123302  | 0 | 1 | "1" | "1" | "1" | "1" |
| 1453 | -3.24803 | 2.03383e-4 | 0 | 1 | "1" | "1" | "1" | "1" |
| 1510 | 2.10708  | 7.60294e-5 | 0 | 1 | "1" | "1" | "1" | "1" |
| 1514 | 2.16199  | 0.0280563  | 0 | 1 | "1" | "1" | "1" | "1" |
| 1526 | -2.97009 | 0.00582803 | 0 | 1 | "1" | "1" | "1" | "1" |
| 1563 | -2.0115  | 0.0171667  | 0 | 1 | "1" | "1" | "1" | "1" |
| 1572 | 2.52943  | 0.0121619  | 0 | 1 | "1" | "1" | "1" | "1" |
| 1662 | 2.1056   | 0.00616959 | 0 | 1 | "1" | "1" | "1" | "1" |
| 1685 | -2.13905 | 0.00174601 | 0 | 1 | "1" | "1" | "1" | "1" |
| 1708 | -2.51956 | 0.0135997  | 0 | 1 | "1" | "1" | "1" | "1" |
| 1743 | -2.14373 | 0.00749905 | 0 | 1 | "1" | "1" | "1" | "1" |
| 1746 | -2.54728 | 0.0102367  | 0 | 1 | "1" | "1" | "1" | "1" |
| 1754 | -3.50464 | 0.00260713 | 0 | 1 | "1" | "1" | "1" | "1" |

**Supplemental data illustrates the MALDI-TOF-TOF MS/MS spectra of ions from the proteins that listed in Table 2, and the detailed information of mascot search results.**

### Spot 1572

Match to: IPI00197703 Score: 270 Expect: 4e-023

Tax\_Id=10116 Gene\_Symbol=Apoa1 Apolipoprotein A-I precursor

Nominal mass (M<sub>r</sub>): 30043; Calculated pI value: 5.52

Sequence Coverage: 71%

Matched peptides shown in **Bold Red**

1 MKA AVL AVAL VFLTGCQ AWE FWQQDEPQSQ WDR**VKDFATV YVDAVKDSGR**  
51 **DYVSQFESST LGKQLNLNLL DNWDTLGSTV GRLQEQLGPV TQEFWANLEK**  
101 **ETDWLRNEMN KDLNVKQKM QPHLDEFQEK WNEEVEAYRQ KLEPLGTELH**  
151 **KNAKEMQRHL KVVAEEFRDR MRVNADALRA KFLYSDQMR ENLAQRLTEI**  
201 **KNHPTLIEYH TKASDHLKTL GEKAKPALDD LGQGLMPVLE AWKAKIMSMI**  
251 **DEAKKKLNA**

### Probability Based Mowse Score

Ions score is  $-10 \cdot \log(P)$ , where P is the probability that the observed match is a random event.

Protein scores greater than 59 are significant ( $p < 0.05$ ).

Protein scores are derived from ions scores as a non-probabilistic basis for ranking protein hits.

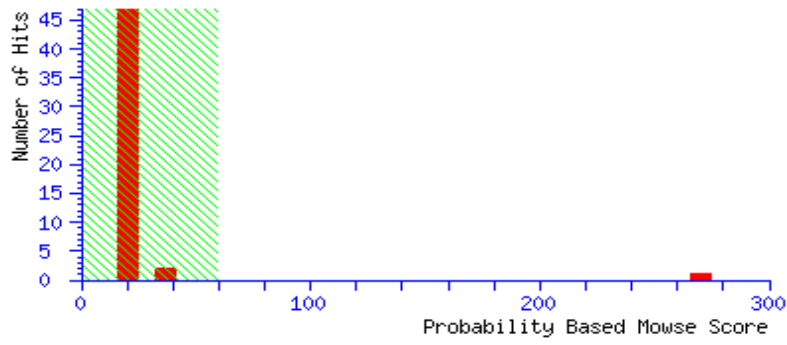

MS/MS Fragmentation of **FGLYSDQMR**

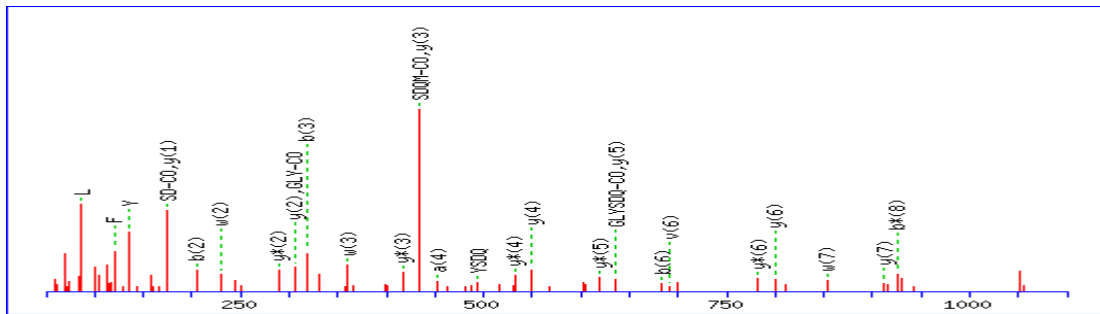

MS/MS Fragmentation of **VVAEEFR**

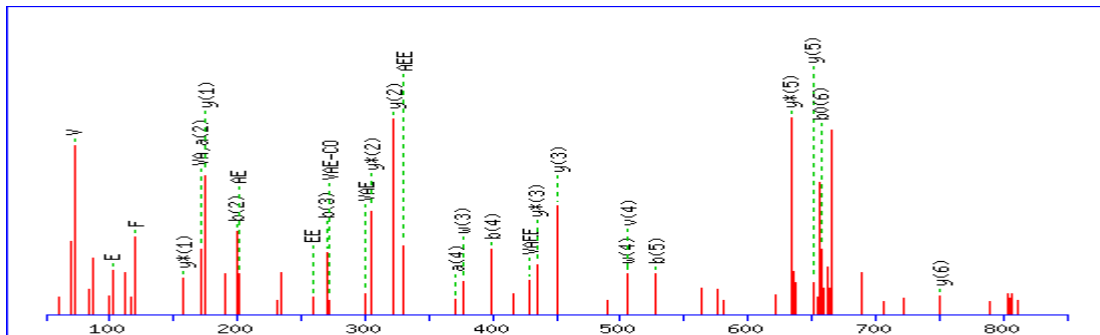

MS/MS Fragmentation of **WNEEVEAYR**

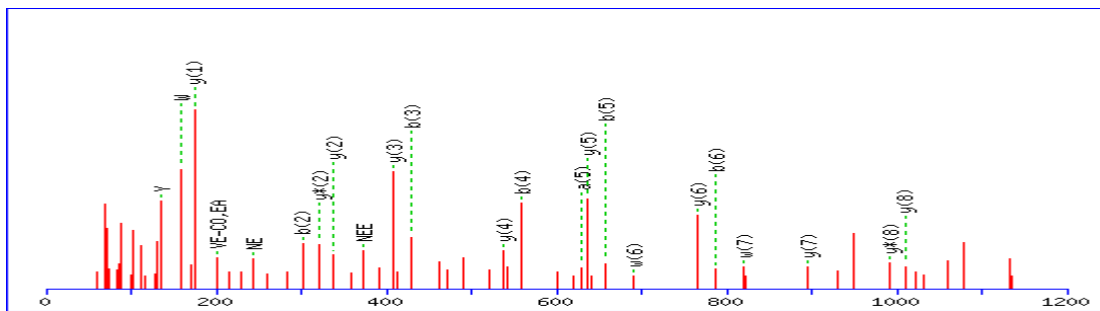

MS/MS Fragmentation of **DSGRDYVSQFESSTLGK**

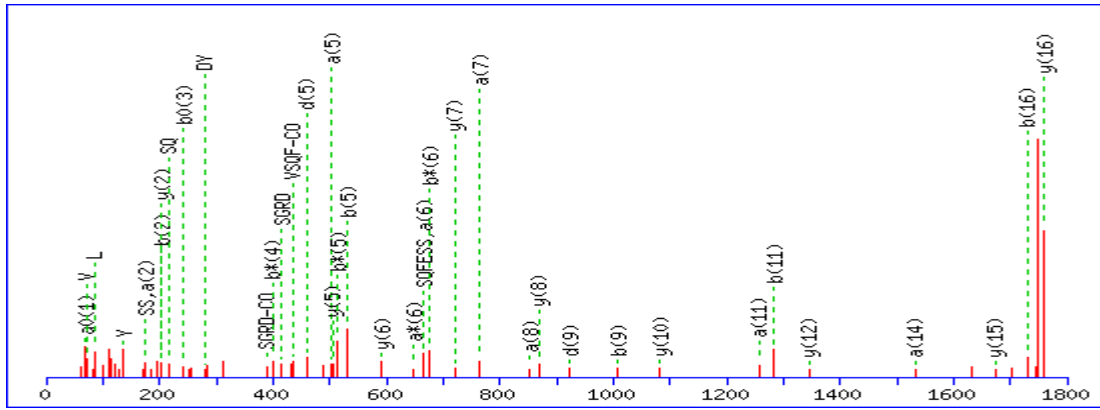

### Spot 1271

Match to: IPI00210823 Score: 498 Expect: 6.4e-046

Tax\_Id=10116 Gene\_Symbol=Akr1d1 3-oxo-5-beta-steroid 4-dehydrogenase

Nominal mass ( $M_r$ ): 37354; Calculated pI value: 6.18

Sequence Coverage: 54%

Matched peptides shown in **Bold Red**

1 MNLSTANHHI PLNDGNSIPI IGLGTYS DPR PVPGKTFIAV **KTAIDEGYRH**  
 51 **IDGAYVYRNE HEVGEAIREK** VAE**GKVKREE** IFY**CGKLWST** DHD**PEMVRPA**  
 101 **LERTLQTLKL** DYIDLYIEM PMAFKPGEEF YPKDENG**RVI** YHKS**NLCATW**  
 151 EALEACKDAG LVK**SLGVSNF** **NRQLE**VILN **KPGLKYK**PVT **NQVECH**PYFT  
 201 **QTKLLE**V**SAS** SMTSFIVAYS PLGTCRN**PLW** **VNVSSP**LLK **DELL**SLG**KK**  
 251 **YNKTQA**QIVL **RFDIQ**RLVV **IPKST**PERI **KENFQ**IFDFS **LTKEEM**KDIE  
 301 **ALNKN**RVFVE MLMWSDHPEY PFHDEY

### Probability Based Mowse Score

Ions score is  $-10 \cdot \log(P)$ , where P is the probability that the observed match is a random event.

Protein scores greater than 59 are significant ( $p < 0.05$ ).

Protein scores are derived from ions scores as a non-probabilistic basis for ranking protein hits.

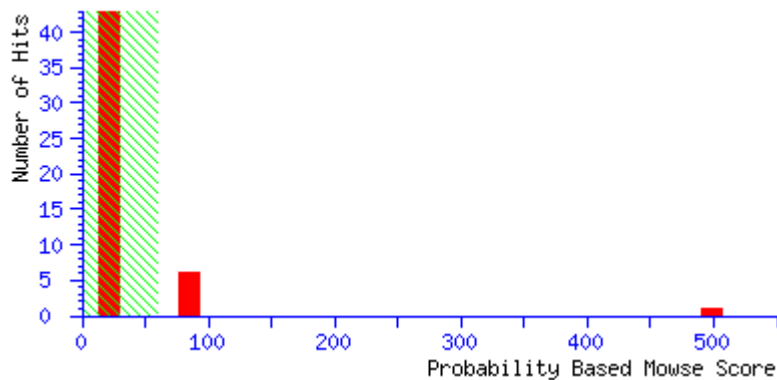

MS/MS Fragmentation of **IKENFQIFDFSLTK**

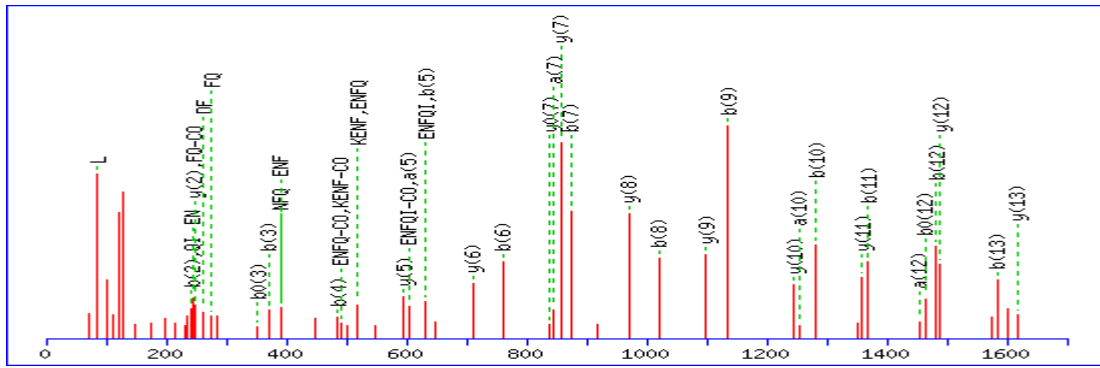

MS/MS Fragmentation of **YKPVTNQVECHPYFTQTK**

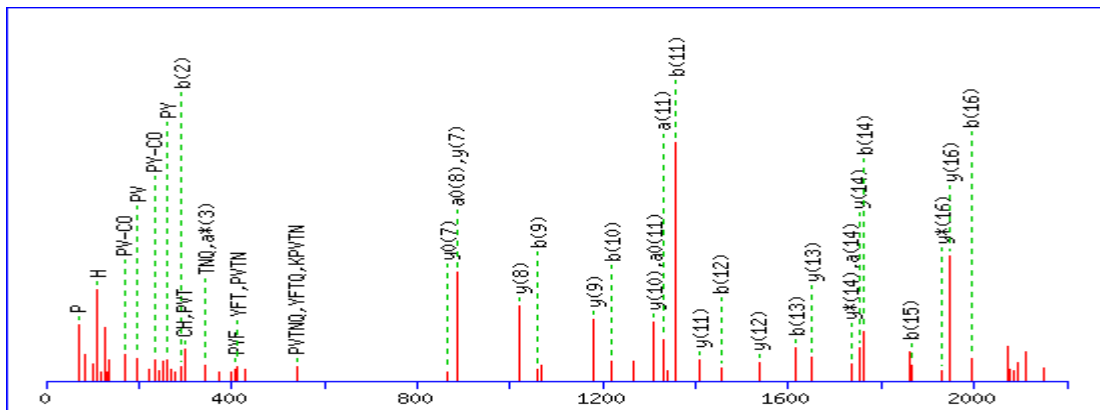

MS/MS Fragmentation of **SLGVSNFNR**

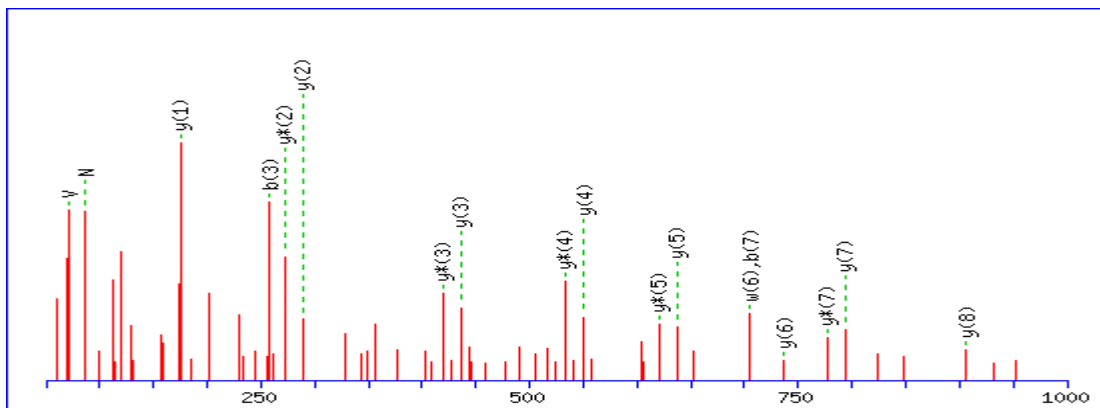

MS/MS Fragmentation of **HIDGAYVYR**

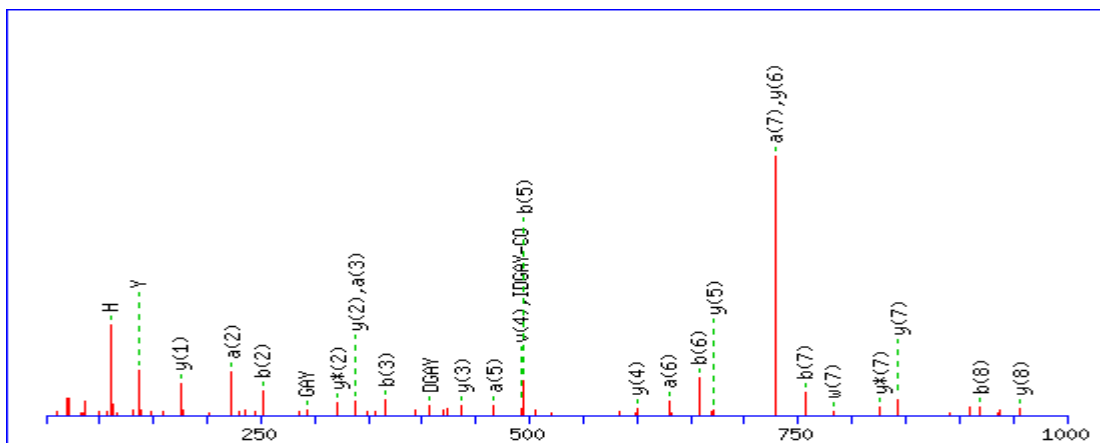

## Spot 1510

Match to: IPI00231767 Score: 287 Expect: 8e-025

Tax\_Id=10116 Gene\_Symbol=Tpi1 Triosephosphate isomerase

Nominal mass ( $M_r$ ): 26832; Calculated pI value: 6.89

Sequence Coverage: 75%

Matched peptides shown in **Bold Red**

1 MAPSRK**FFVG GNWK**MNGRKK CLGELICTLN AAKLPADTEV **VCAPPTAYID**  
51 **FARQKLDPKI AVAAQNCYKV TNGAFTGEIS PGMIKDLGAT WVVLGHSERR**  
101 **HIFGESDELI GQKVNHALSE GLGVIACIGE KLDEREAGIT EKVVFEQTKA**  
151 IADNVKDWCK **VVLAYEPVWA IGTGKTATPQ QAQEVHEKLR** GWLKC�VSEG  
201 **VAQCTRIIYG GSVTGATCKE LASQPDVDGF LVGGASLKPE FVDIINAKQ**

### Probability Based Mowse Score

Ions score is  $-10 \cdot \log(P)$ , where P is the probability that the observed match is a random event.

Protein scores greater than 59 are significant ( $p < 0.05$ ).

Protein scores are derived from ions scores as a non-probabilistic basis for ranking protein hits.

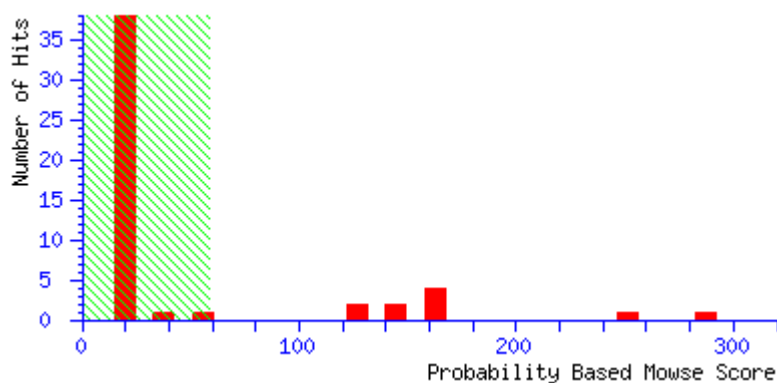

### MS/MS Fragmentation of **DLGATWVVLGHSER**

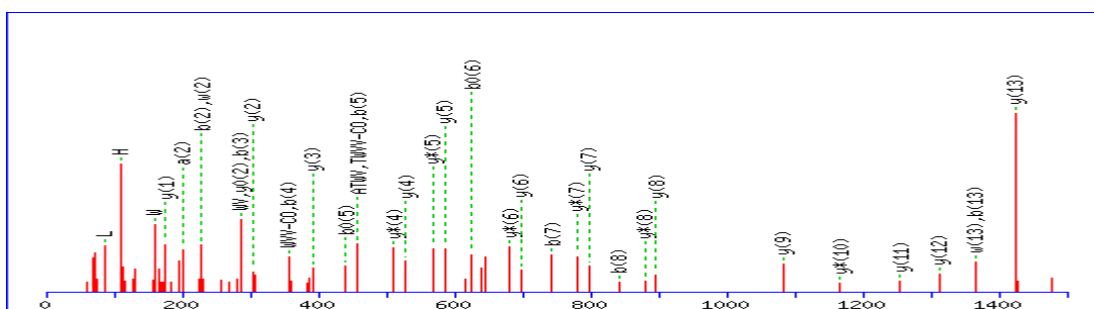

### MS/MS Fragmentation of **LPADTEVVCAPPTAYIDFAR**

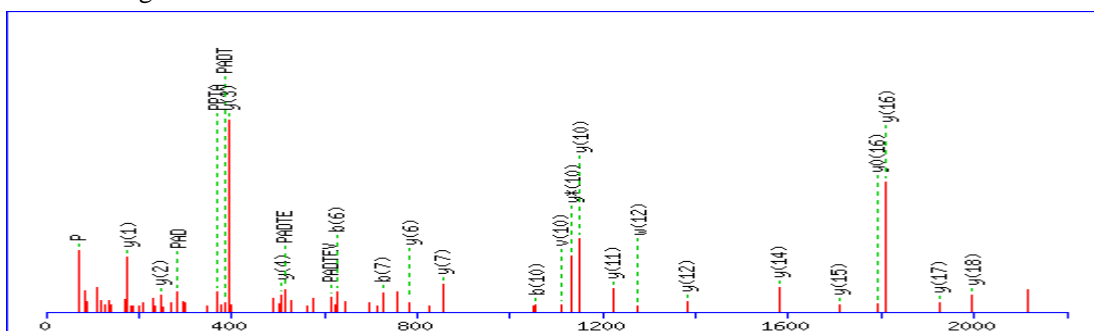

## Spot 1280

Match to: IPI00198717 Score: 428 Expect: 6.4e-039

Tax\_Id=10116 Gene\_Symbol=Mdh1 Malate dehydrogenase, cytoplasmic

Nominal mass ( $M_r$ ): 36460; Calculated pI value: 6.16

Sequence Coverage: 46%

Matched peptides shown in **Bold Red**

1 MSEPIRVLVT GAAGQIAYSL LYSIGNSVF GKDQPIILVL LDITPMMGVL  
51 DGVLMEQLQC ALPLLQDVIA TDKEEVAFKD **LDVAVLVGSM PRREGMERKD**  
101 LLKANVKIFK SQGAALEKYA KKSVKVIVVG **NPANTNCLTA SKSAPSIPKE**  
151 **NFSCLTRLDH** NRAKSQIALK **LGV TADDVKN VIIWGNHSST QYPDVNHAKV**  
201 KLQGK**EVGVY EALKDDSWLK GEFITTVQQR** GAAVIKARKL SSAMSAAKAI  
251 **SDHIRDIWFG** TPEGEFVSMG VISDGNISYGV PDDLISYFPV VIKNKTWK**FV**  
301 **EGLPINDFSR EKMDLTAKEL TEEKETAFAEF LSSA**

### Probability Based Mowse Score

Ions score is  $-10 \cdot \log(P)$ , where P is the probability that the observed match is a random event.

Protein scores greater than 59 are significant ( $p < 0.05$ ).

Protein scores are derived from ions scores as a non-probabilistic basis for ranking protein hits.

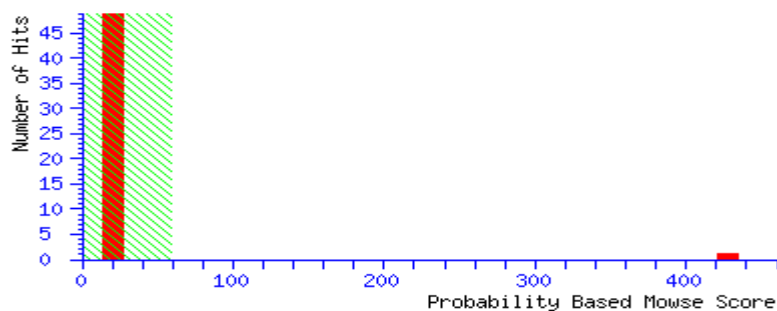

### MS/MS Fragmentation of **FVEGLPINDFSR**

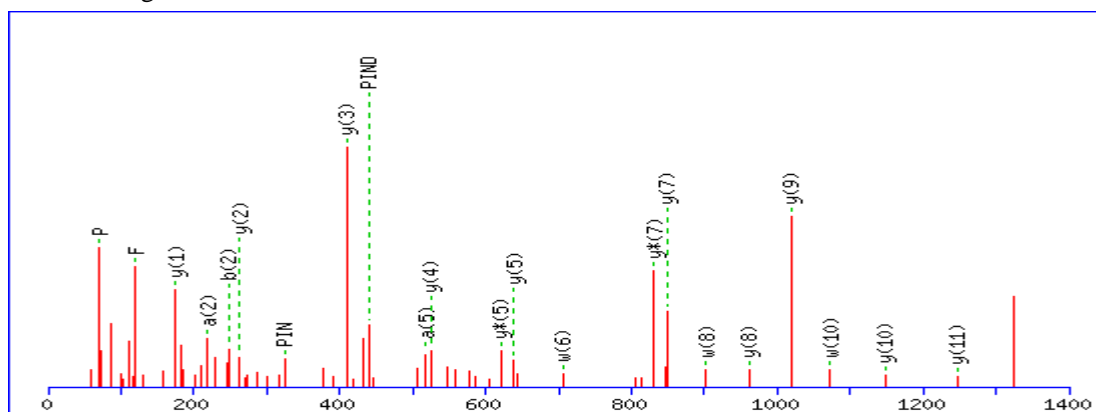

### MS/MS Fragmentation of **GEFITTVQQR**

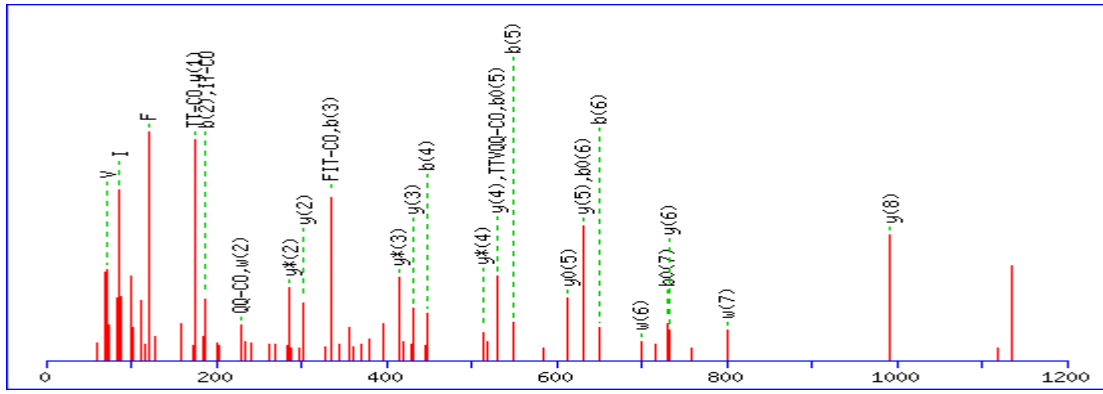

MS/MS Fragmentation of **ENFSCLTR**

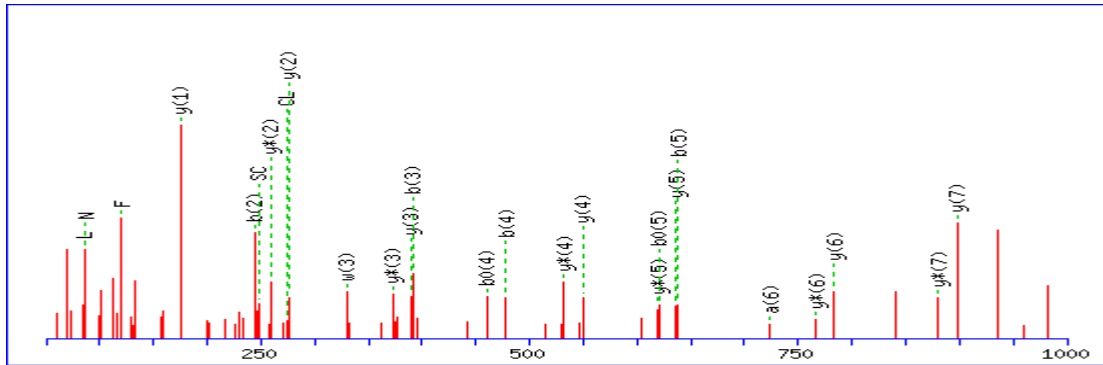

MS/MS Fragmentation of **SAPSIPKENFSCLTR**

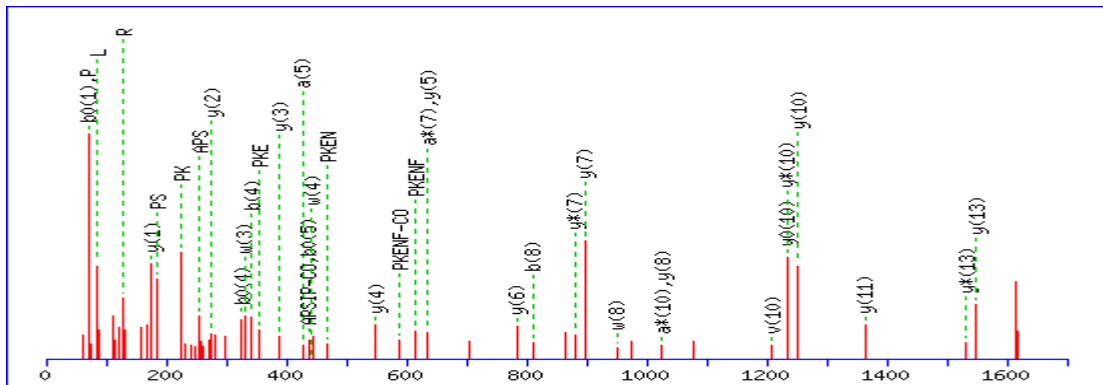

MS/MS Fragmentation of **DLDVAVLVGSMPR**

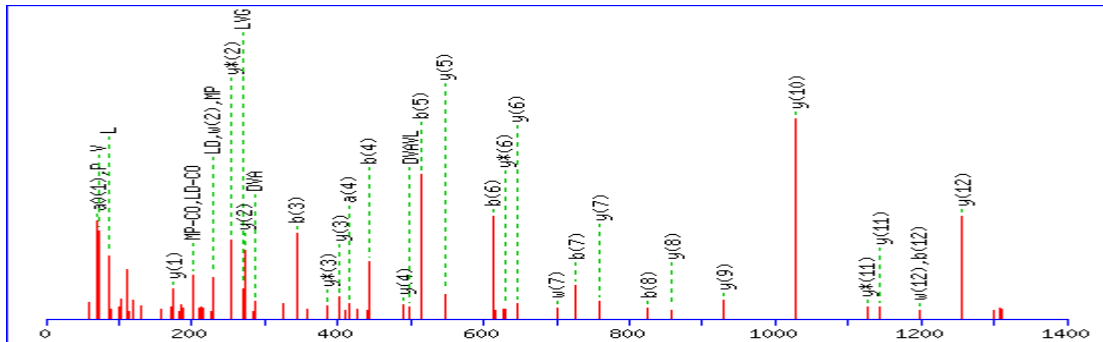



## Spot 1121

Match to: IPI00360056 Score: 325 Expect: 1.3e-028

Tax\_Id=10116 Gene\_Symbol=Galm Aldose 1-epimerase

Nominal mass ( $M_r$ ): 37869; Calculated pI value: 6.18

Sequence Coverage: 51%

Matched peptides shown in **Bold Red**

1 MVSVTR**TVFG ELPSGGGAVE KFQLRSDQLN VDIISWGCTI TALQVK**DRQG  
51 **KASDVVLGFA ELEGYLQKQP YFGAVVGRVA** NRIAKGRFTV DGKEYHLPIN  
101 **REPNSLHGGF RGFDKVLWTP QVLSNGVQFS RVSPDGEEGY** PGELKVWVTY  
151 **TLDGGELVVN YRAQASQTPV** VNLTNHSYFN LAGQGSPDIY DHEVTIAADA  
201 YLPVDETLP TGVIAPVEGT AFDLRKPVEL GK**HLQSYHIH GFDHNFCLKE**  
251 SKEKKFCARV **HHAASGRILE VYTTQPGVQF YTGNFLDRTL** KGKSGEVYPK  
301 HSGFCLETQN WPDAVNQPQF PPILLRPGEE YNHTTWFKFS VA

## Probability Based Mowse Score

Ions score is  $-10 \cdot \log(P)$ , where P is the probability that the observed match is a random event.

Protein scores greater than 59 are significant ( $p < 0.05$ ).

Protein scores are derived from ions scores as a non-probabilistic basis for ranking protein hits.

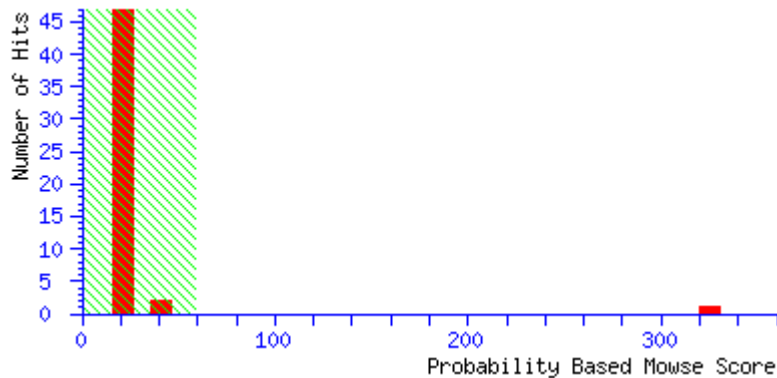

## MS/MS Fragmentation of **HLQSYHIHGFDHNFCLK**

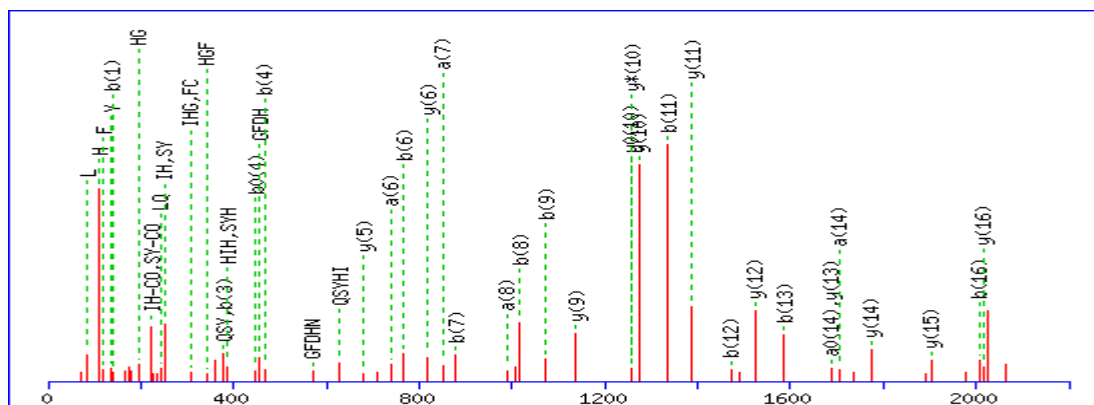

## MS/MS Fragmentation of **VWVTYTLDGGELVVNYR**

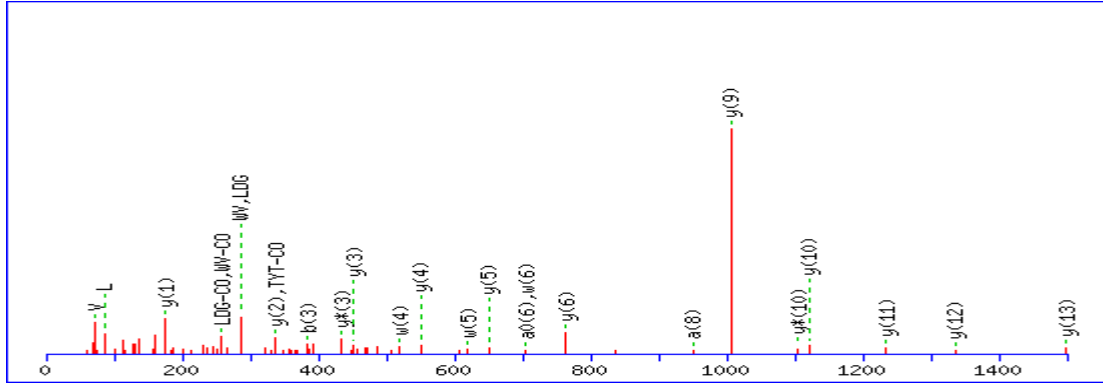

MS/MS Fragmentation of **EYHLPINR**

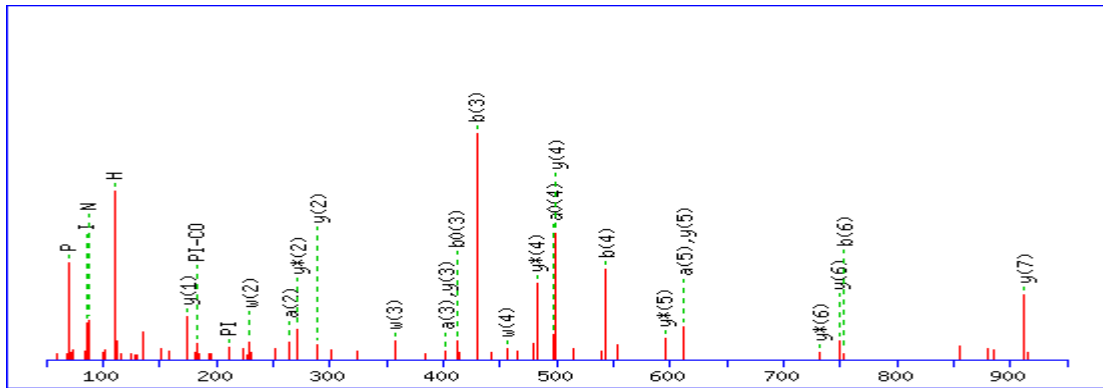

MS/MS Fragmentation of **QPYFGAVVGR**

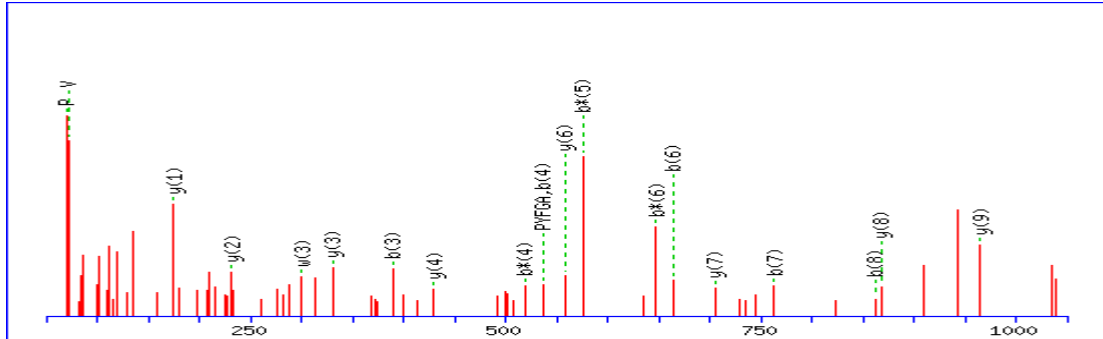

### Spot 1353

Match to: IPI00194324 Score: 151 Expect: 3.2e-011

Tax\_Id=10116 Gene\_Symbol=Pdhb Pyruvate dehydrogenase E1 component subunit beta, mitochondrial precu

Nominal mass (M<sub>r</sub>): 38957; Calculated pI value: 6.20

Sequence Coverage: 34%

Matched peptides shown in **Bold Red**

1 **MAAVAGLVRG** PLRQASGLLK RRFHRSAPAA VQLTVREAIN **QGMDEELERD**  
51 **EKVFLGEEV AQYDGAYKVS** RGLWKYGDK RIIDTPISEM GFAGIAVGAA  
101 MAGLRPICEF MTFNFSMQAI DQVINSAAKT **YMSAGLQPV PIVFR**GPNGA  
151 SAGVAAQHSQ CFAAWYGHCP GLKVVSPWNS EDAKGLIKSA IRDDNPVVML  
201 ENELMYGVAE ELPTAQSKD FLIPIGKAKI ERQGTHITVV AHSRPVGHCL  
251 EAAAVLSK**EG IECEVINLRT IRPMDIEAIE ASVMKTNHLV TVEGGWPQFG**  
301 **VGAEICARIM EGPAFNFLDA PAVR**VTGADV PMPYAKILED NSIPQVKDII  
351 FAIKKTLNI

### Probability Based Mowse Score

Ions score is  $-10 \cdot \log(P)$ , where P is the probability that the observed match is a random event.

Protein scores greater than 59 are significant ( $p < 0.05$ ).

Protein scores are derived from ions scores as a non-probabilistic basis for ranking protein hits.

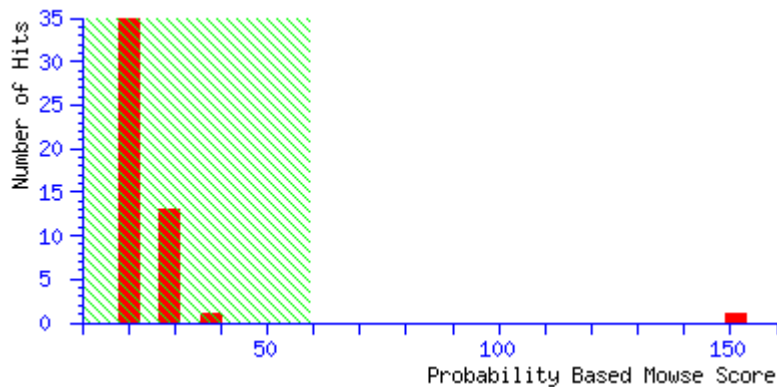

### MS/MS Fragmentation of **IMEGPAFNFLDAPAVR**

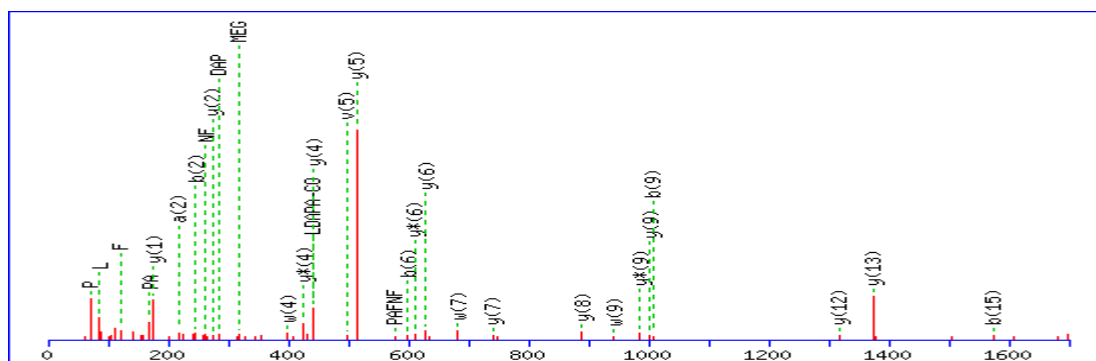

### MS/MS Fragmentation of **TYMSAGLQPVPIVFR**

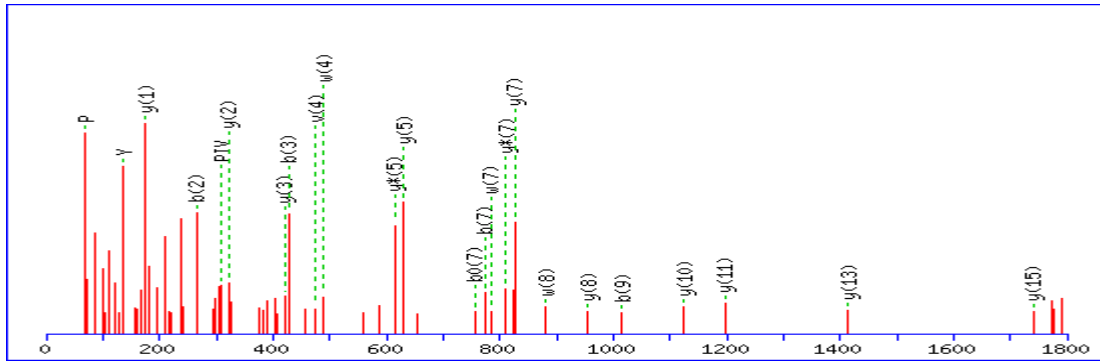

### Spot 1273

Match to: IPI00197900 Score: 183 Expect: 2e-014

Tax\_Id=10116 Gene\_Symbol=Eef1d Translation elongation factor 1-delta subunit

Nominal mass ( $M_r$ ): 28748; Calculated pI value: 4.86

Sequence Coverage: 49%

Matched peptides shown in **Bold Red**

1 **MATNFLMHEK** **IWFDKFKYDD** **AERRFYEQMN** **GPVTAGSRQS** **SGPGASSGPG**  
 51 **GDHSDLIVRI** **ASLEVENQNL** **RGVVQDLQA** **ISKLEVLST** **LEKSSPTHRA**  
 101 **TAPQTQHVSP** **MRQVEPPAKK** **GATPAEDDED** **NDIDLFGSDE** **EEDKEAARL**  
 151 **REERLRQYAE** **KKAKKPTLVA** **KSSILLDVKP** **WDETDMAQL** **ETCVRSIQLD**  
 201 **GLVWGASKLV** **PVGYGIRKLQ** **IQCVEDDKV** **GTDLLEEEIT** **KFEEHVQSVD**  
 251 **IAAFNKI**

### Probability Based Mowse Score

Ions score is  $-10 \cdot \log(P)$ , where P is the probability that the observed match is a random event.

Protein scores greater than 59 are significant ( $p < 0.05$ ).

Protein scores are derived from ions scores as a non-probabilistic basis for ranking protein hits.

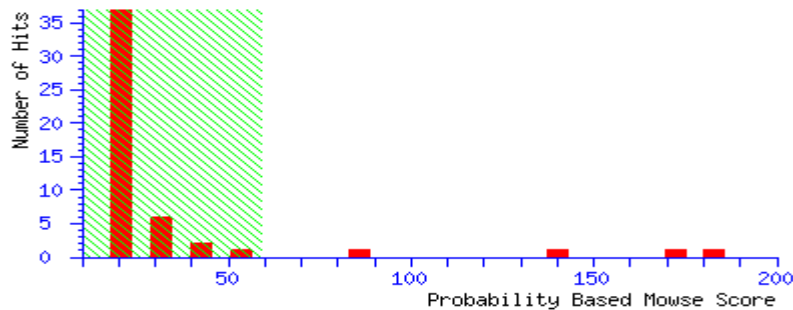

MS/MS Fragmentation of **LVPVGYGIR**

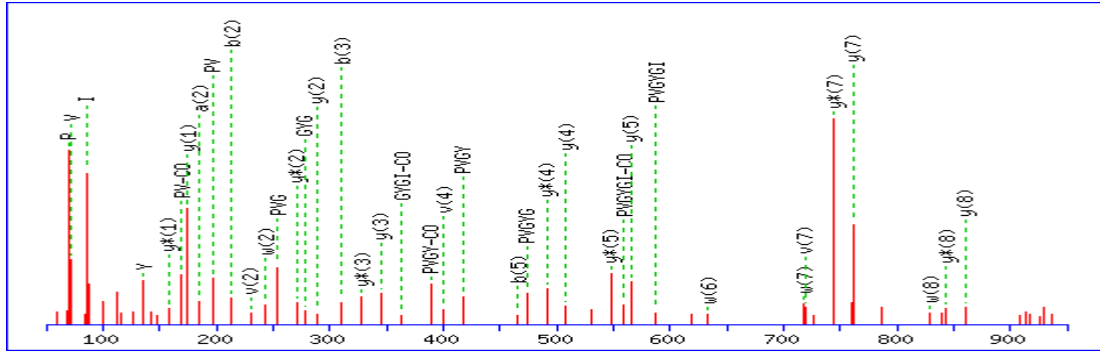

MS/MS Fragmentation of **IASLEVENQNLR**

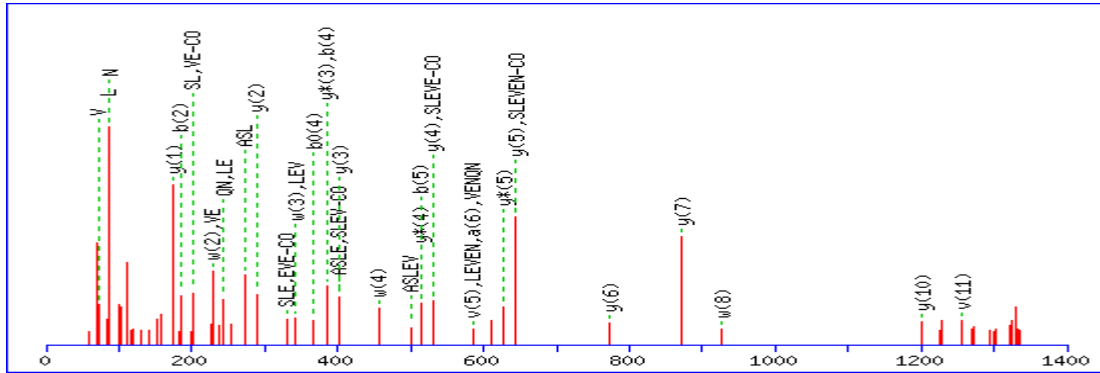

MS/MS Fragmentation of **FYEQMNGPVTAGSR**

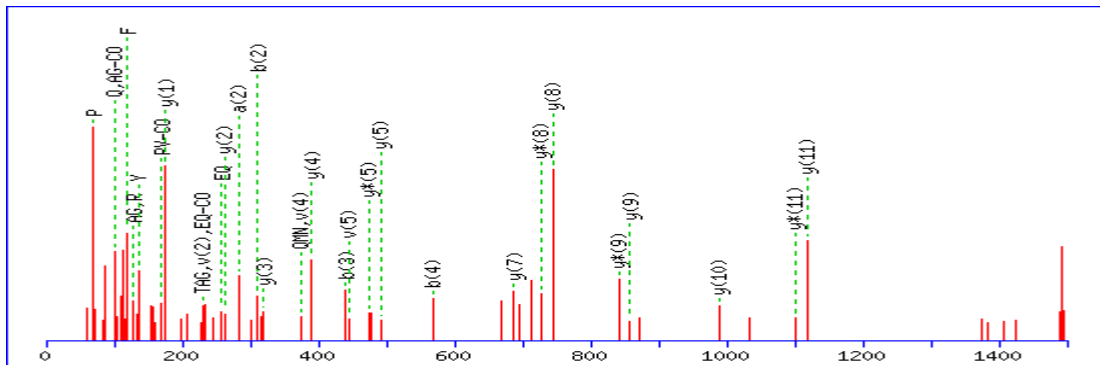

### Spot 502

Match to: IPI00515829 Score: 191 Expect: 3.2e-015

Tax\_Id=10116 Gene\_Symbol=Kng1 Kininogen 1

Sequence Coverage: 37%

Matched peptides shown in **Bold Red**

1 MKLITILLLC S~~RLL~~PLSLAQE EGAQELNCND ETVFQAVDTA LK**KYNAELES**  
51 **GNQFVLYR**VT KGTK**KDGAET** LYSFKYQIKE GNCSVQSGLT WQDCDFKDAE  
101 EAATGECTTT LGK**KENKFSV** ATQICNITPG **KG**PKKTEEDL CVGCFQPIPM  
151 DSSDLKPVLK HAVEHFNNNT KH**THL**FALRE V**KS**AHSQVVA **GM**NYKIIYSI  
201 VQTNCS**KEDF** PSLREDCVPL PYGDHGECTG HTHVDIHNTI AGFSQSCDLY  
251 PGDDL**FELL**P **K**NCRC**PREI** PVD**SPEL**KEA **L**GHSIAQLNA **Q**HNHIFYFKI  
301 DTVKK**ATSQV** **V**AGVIYVIEF IARETNCSKQ SK**TEL**TADCE **T**KHLGQSLNC  
351 **NANV**MRPWE **N**KVVPTVRCQ ALDMMISRPP GFSPFRLVRV QETKEG**TTRL**

**Probability Based Mowse Score**

Ions score is  $-10 \cdot \log(P)$ , where P is the probability that the observed match is a random event.

Protein scores greater than 59 are significant ( $p < 0.05$ ).

Protein scores are derived from ions scores as a non-probabilistic basis for ranking protein hits.

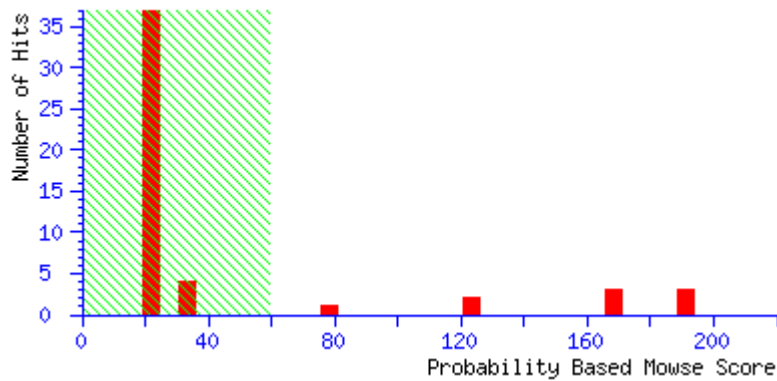

**MS/MS Fragmentation of HTHLFALR**

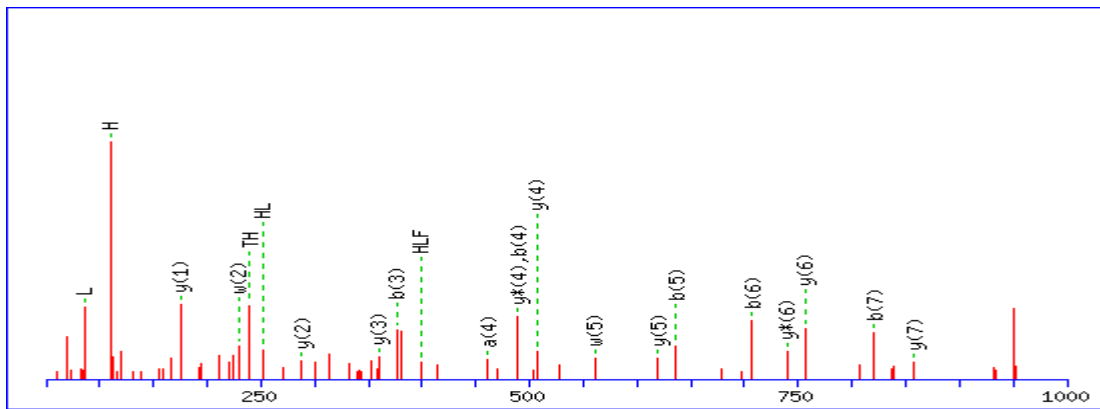

**MS/MS Fragmentation of YNAELESGNQFVLYR**

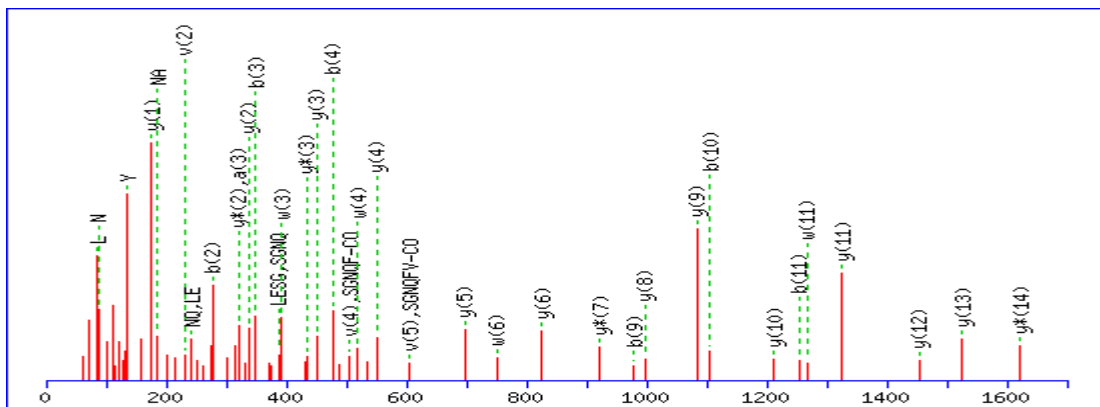

### Spot 37

Match to: IPI00210644 Score: 179 Expect: 5e-014

Tax\_Id=10116 Gene\_Symbol=Cps1 Carbamoyl-phosphate synthase [ammonia],  
mitochondrial precursor

Nominal mass (M<sub>r</sub>): 164476; Calculated pI value: 6.33

Sequence Coverage: 22%

Matched peptides shown in **Bold Red**

1 MTRLTACKV VKTLKSGFGL ANVTSKRQWD FSRPGIRLLS VKAQTAHIVL  
51 EDGTKMKGYS FGHPSSVAGE VVFN TGLGGY SEAL TDPAYK **GQILTMANPI**  
101 **IGNGGAPD TT** ARDELGLNKY MESDGIKVAG LLVLNYSHDY NHWLATKSLG  
151 QWLQEEK**VPA** **IYGV DTRMLT** KIIRD**DKGTML** **GK**IEFEGQSV DFVDPNKQNL  
201 IAEVSTKDVK VFGKGNPTKV **VAVDCGIKNN** **VIRLLV**KRGA EVHLPWNHD  
251 FTQMDYDGLL IAGGPGNPAL AQPLIQNVKK ILES DRKEPL FGISTGNIIT  
301 GLAAGAKSYK MSMANR**GQNQ** **PVLNITNRQA** FITAQNHGYA LDNTLPAGWK  
351 PLFVNVNDQT NEGIMHESKP FFAVQFHPEV SPGPTDTEYL FDSFFSLIKK  
401 **GKGT TITSVL** **PKPALVASRV** EVSKVLILGS GGLSIGQAGE FDYSGSQA VK  
451 AMKEENVKTV LMNPNIASVQ TNEVGLKQAD AVYFLPITPQ FVTEVIKAER  
501 PDGLILGMGG QTALNCGVEL FKRGLKEYG VKVLGTSVES IMATEDRQLF  
551 SDKLNEINEK IAPSFVAVESM EDALK**AA DTI** **GYPVMIR**SAY ALGGLGSGIC  
601 **PNKETLMDLG** **TKAFAMTNQI** **LVER**SVTGWK EIEYEVVRDA DDNCVTV CNM  
651 ENVDAMGVHT GDSVVVAPAQ TLSNAEFQML RRTSINVVRH LGIVGECNIQ  
701 FALHPTSMEY CIIEVNARLS RSSALASKAT **GYPLAFIAAK** **IALGIPLPEI**  
751 **KNVVS GK TSA** **CFEPSLDY MV** **TKIPRWDLDR** **FHGTSSRIGS** SMKSVGEVMA  
801 **IGRTFEESFQ** KALRM**CHPSV** **DGFTPR**LPMN KEWPANL DL R KELSEPSSTR  
851 IYAIKALEN NMSLDEIVKL TSIDKWFLYK MRDILNMDKT **LKGLNSESVT**  
901 **BETLRQAKEI** GFSDKQISKC **LGLTEAQTRE** LRLKKN**IHPW** **VKQIDTLAAE**  
951 YPSVTNYLYV TYNGQEHDIK FDEHGIMVLG CGPYHIGSSV EFDWCAVSSI  
1001 RTLRQLGKKT VVVNCNPETV STDFDECDKL YFEELSLERI LDIYHQEACN  
1051 GCIISVGGQI PNNLAVPLYK NGVK**IMGTSP** **LQIDRAEDRS** IFSAVLDELK  
1101 **VAQAPWK**AVN TLNEALEFAN SVGYPCLLRP SYVLSGSAMN VVFSEDEM KR  
1151 **FLEEATR**VSQ EHPVVLTKFI EGAREVEMDA VGKEGRVISH AISEHVEDAG  
1201 VHSGDATLML PTQTISQGAI EKVKDATRKI AKAF AISGPF NVQFLVK**GND**  
1251 **VLVIECNLRA** SRSFPFVSKT LGVDFIDVAT KVMIGESVDE KHLPTLEQPI  
1301 IPSDYVAIKA **PMFSWPRLRD** ADPILRCEMA STGEVACFGE GIHTAFLK**KAM**  
1351 **LSTGFK**IPQK **GILIGIQSF** **RPRFLGVAEQ** **LHNEGFKLFA** TEATSDWLNA  
1401 NNVPATPVAW PSQEGQNPSL SSIRKLIRDG SIDLVINLPN NNTK**FVHDNY**  
1451 **VIRRTAVDSG** IALLTNFQVT KLFAEAVQKA RTVDSK**SLFH** **YRQYSAGKAA**  
1501

### Probability Based Mowse Score

Ions score is  $-10 \cdot \log(P)$ , where P is the probability that the observed match is a random event.

Protein scores greater than 59 are significant ( $p < 0.05$ ).

Protein scores are derived from ions scores as a non-probabilistic basis for ranking protein hits.

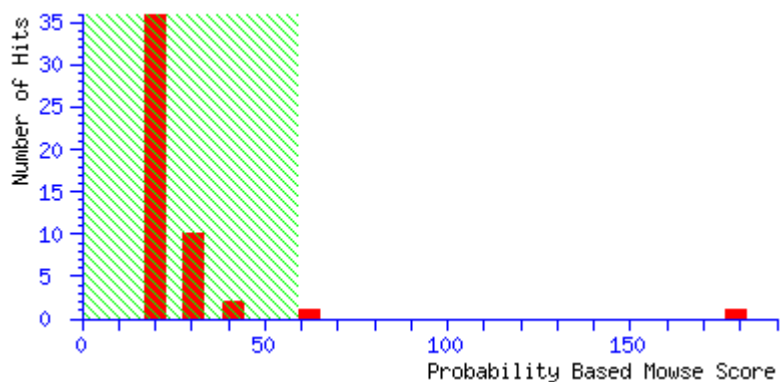

MS/MS Fragmentation of **MCHPSVDGFTPR**

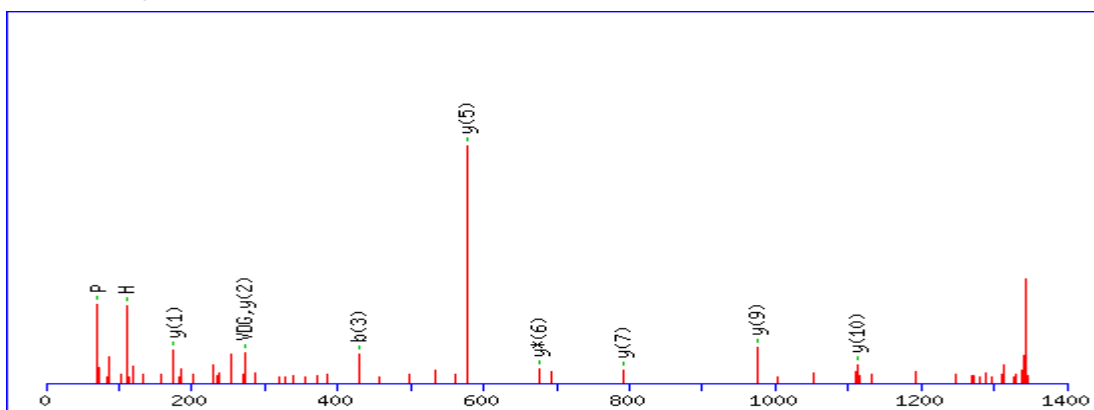

MS/MS Fragmentation of **SLFHRY**

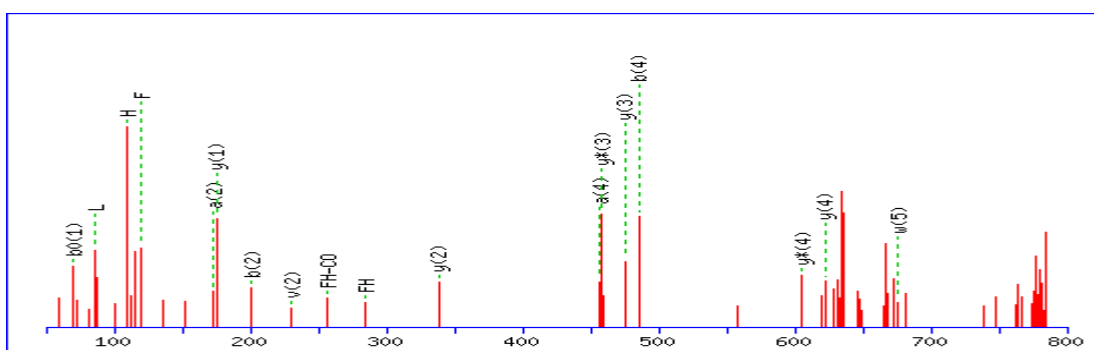

MS/MS Fragmentation of **GILIGIQSFRPR**

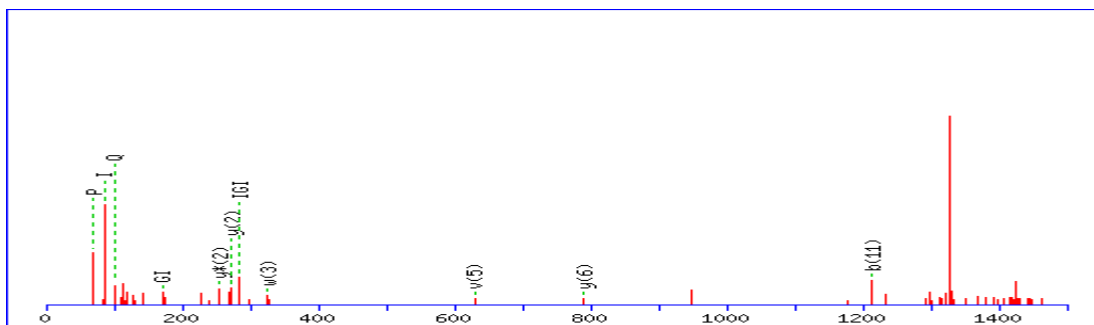

MS/MS Fragmentation of **GQNQPVLNITNR**



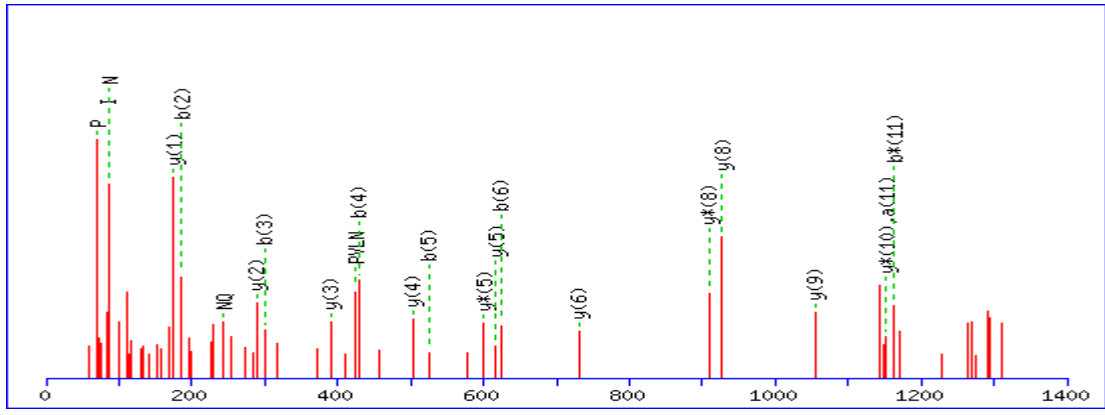

### Spot 1743

Match to: IPI00231963 Score: 376 Expect: 1e-033

Tax\_Id=10116 Gene\_Symbol=Ddt D-dopachrome decarboxylase

Nominal mass ( $M_r$ ): 13125; Calculated pI value: 6.09

Sequence Coverage: 79%

Matched peptides shown in **Bold Red**

1 **MPFVELETNL PASRIPAGLE NRLCAATATI LDKPEDRVSV TIRPGMTLLM**  
51 **NKSTEPCAHL LISSIGVVGT AEQNRSHSSS FFKFLTEELS LDQDR**IIIRF  
101 FPLEPWQIGK KGTVMFTL

### Probability Based Mowse Score

Ions score is  $-10 \cdot \log(P)$ , where P is the probability that the observed match is a random event.

Protein scores greater than 59 are significant ( $p < 0.05$ ).

Protein scores are derived from ions scores as a non-probabilistic basis for ranking protein hits.

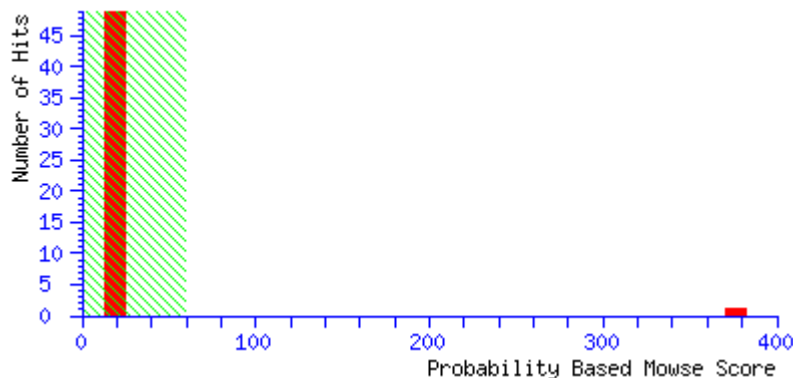

### MS/MS Fragmentation of **FLTEELSLDQDR**

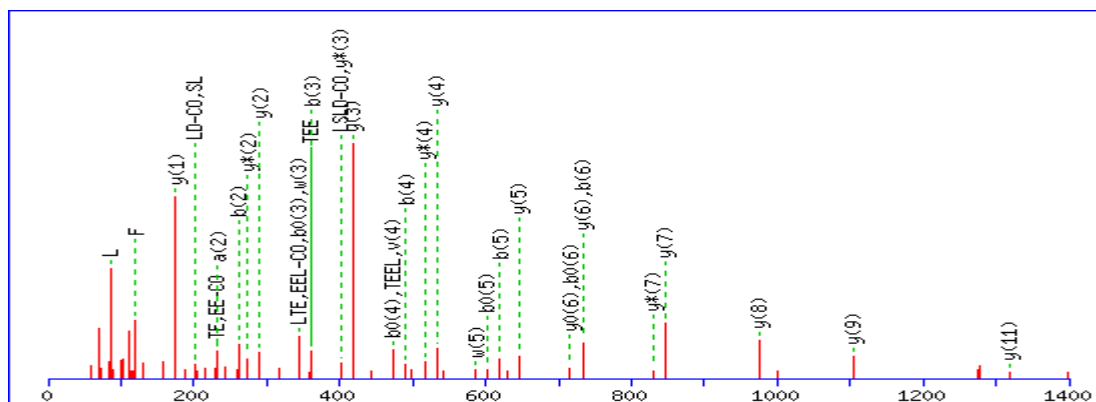

### MS/MS Fragmentation of **STEPCAHLLISSIGVVGTAEQNR**

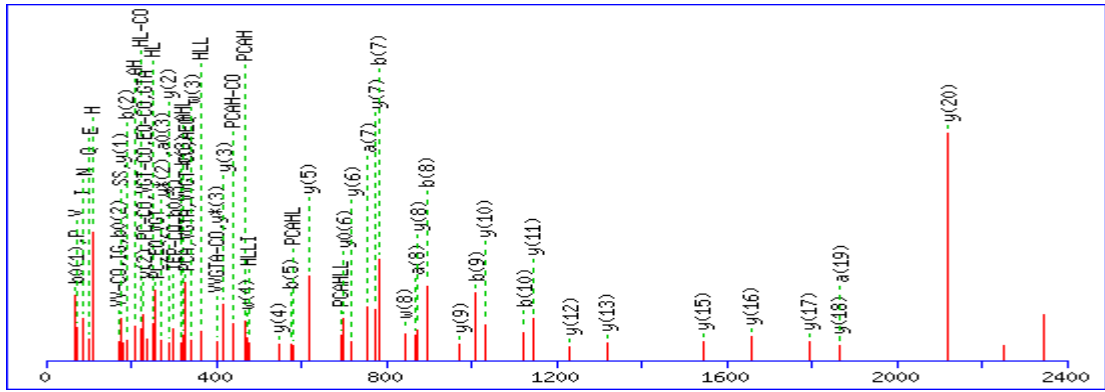

MS/MS Fragmentation of **VSVTIRPGMTLLMNK**

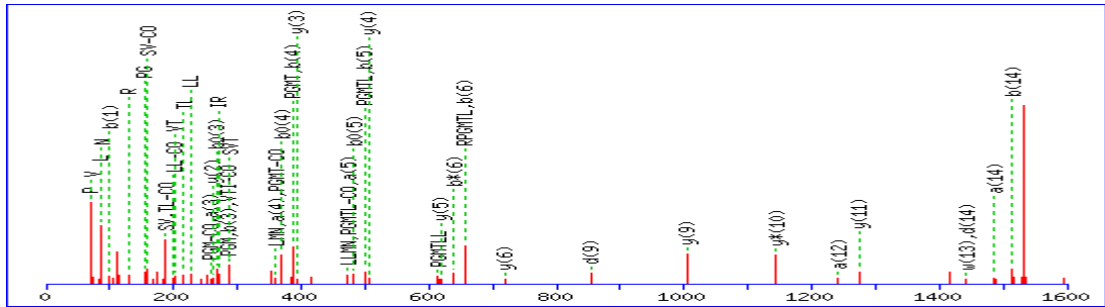

MS/MS Fragmentation of **LCAATATILDKPEDR**

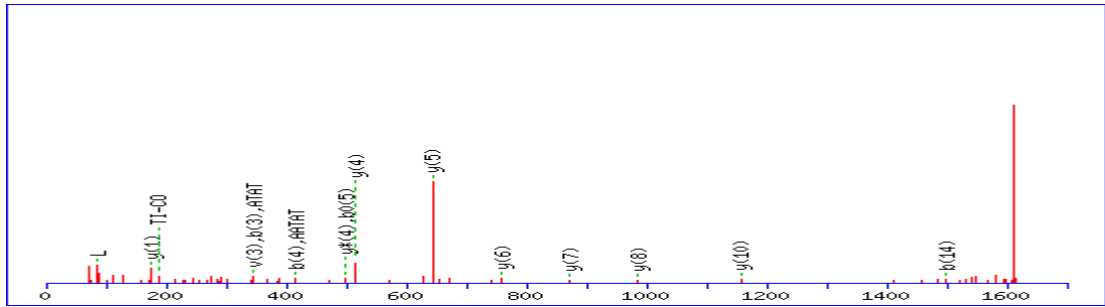

MS/MS Fragmentation of **IPAGLENR**

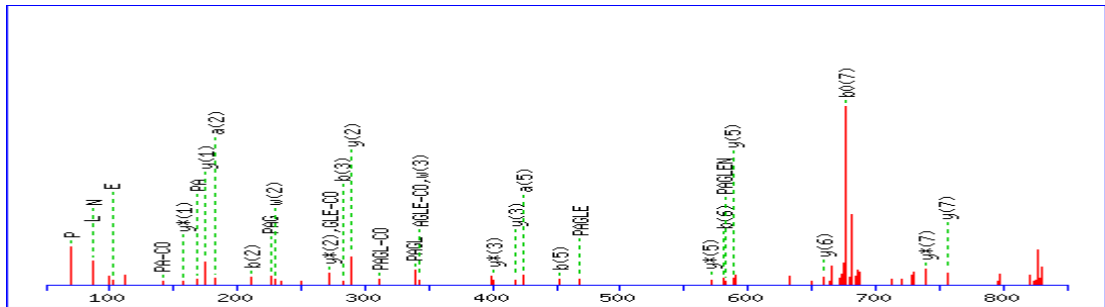

### Spot 1708

Match to: IPI00324380 Score: 146 Expect: 1e-010

Tax\_Id=10116 Gene\_Symbol=Ttr Transthyretin precursor

Nominal mass (M<sub>r</sub>): 15710; Calculated pI value: 5.77

Sequence Coverage: 20%

Matched peptides shown in **Bold Red**

1 MASLRLFLLC LAGLIFASEA GPGGAGESKC PLMKVLDVAV RGSPAVDVAV  
51 KVF~~KKTADGS~~ WEPFASGKTA ESGELHGLTT DEK**FTEGVYR** VELDTKSYWK  
101 **ALGISPFHEY** **AEVVFTANDS** **GHR**HYTIAAL LSPYSYSTTA VVSNPQN

### Probability Based Mowse Score

Ions score is  $-10 \cdot \log(P)$ , where P is the probability that the observed match is a random event.

Protein scores greater than 59 are significant ( $p < 0.05$ ).

Protein scores are derived from ions scores as a non-probabilistic basis for ranking protein hits.

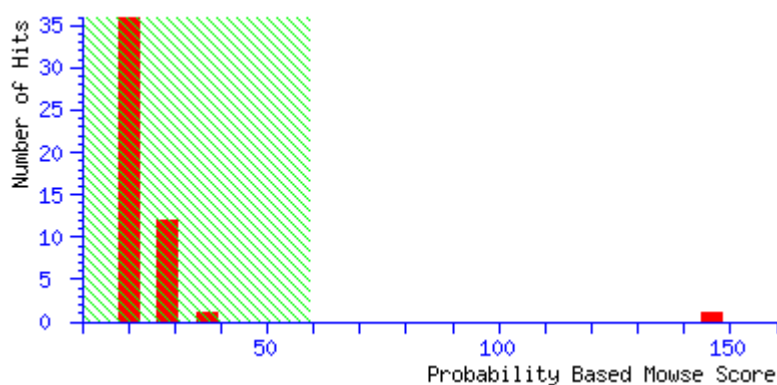

### MS/MS Fragmentation of **ALGISPFHEYAEVVFTANDSGHR**

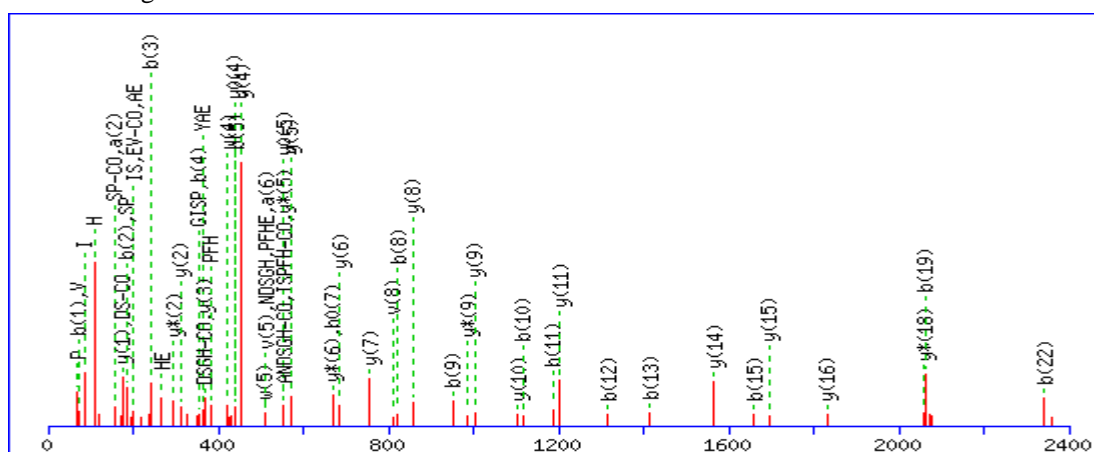

### Spot 1168

Match to: IPI00327518 Score: 334 Expect: 1.6e-029

Tax\_Id=10116 Gene\_Symbol=Arg1 Arginase-1

Nominal mass ( $M_r$ ): 36481; Calculated pI value: 6.51

Sequence Coverage: 62%

Matched peptides shown in **Bold Red**

1 MQQQQQEPW MSMSSKPKPI EIIGAPFSKG QPRGGVEKGP AALRKAGLVE  
51 **KLKETYNVR DHGDLAFVDV PNDSPFQIVK** NPRSVGKANE **QLAAVVAETQ**  
101 **KNGTISVVLG GDHSMAGSI SGHARVHPDL** CVIWVDAHTD INTPLTSSG  
151 NLHGQPVAFL LKELKGKFPD VPGFSWVTPC ISAK**DIVYIG LRDVDPGEHY**  
201 **IIKTLGIKYF SMTEVDKLG I GKVMEETFSY LLGRKKRPIH LSFVDVGLDP**  
251 **VFTPATGTPV VGGLSYREGL YITEEIKTG LLSGLDIMEV NPTLGKTPEE**  
301 **VTRTVNTAVA LTLSCFGTKR EGNHKPETDY LKPPK**

### Probability Based Mowse Score

Ions score is  $-10 \cdot \log(P)$ , where P is the probability that the observed match is a random event.

Protein scores greater than 59 are significant ( $p < 0.05$ ).

Protein scores are derived from ions scores as a non-probabilistic basis for ranking protein hits.

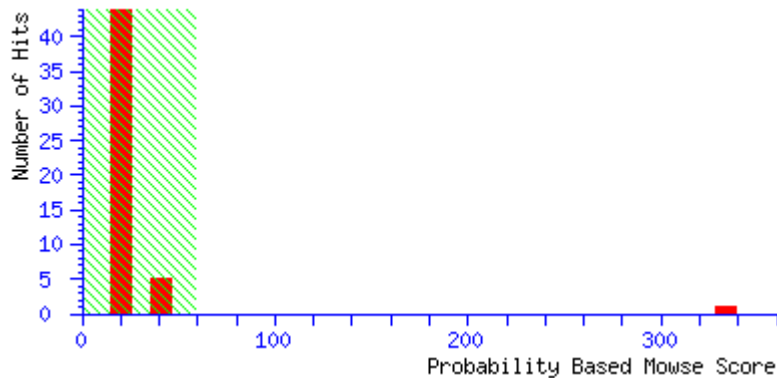

### MS/MS Fragmentation of **VMEETFSYLLGR**

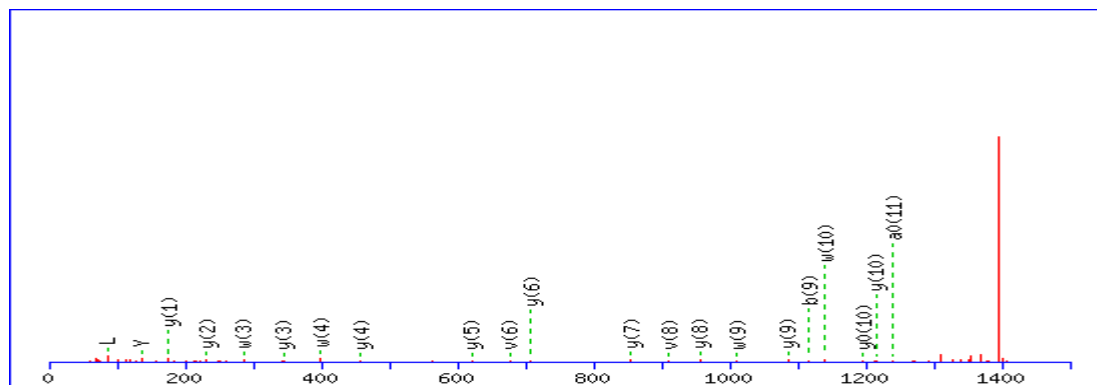

### MS/MS Fragmentation of **VMEETFSYLLGR**

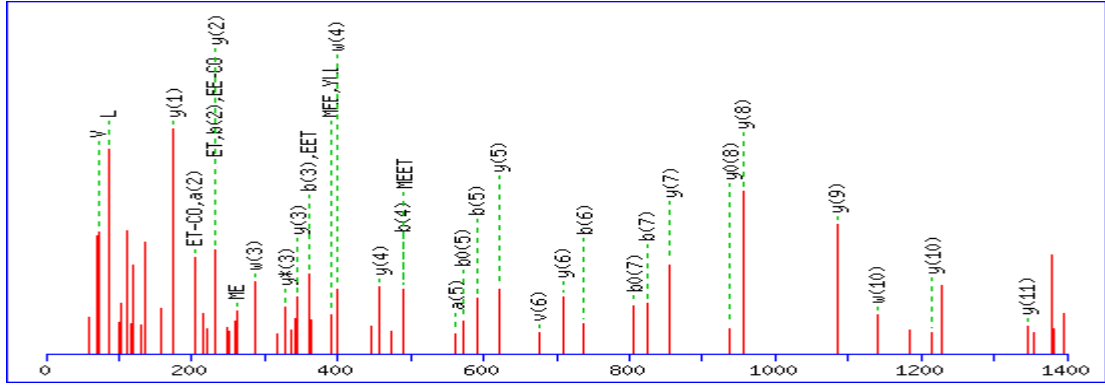

MS/MS Fragmentation of **DIVYIGLR**

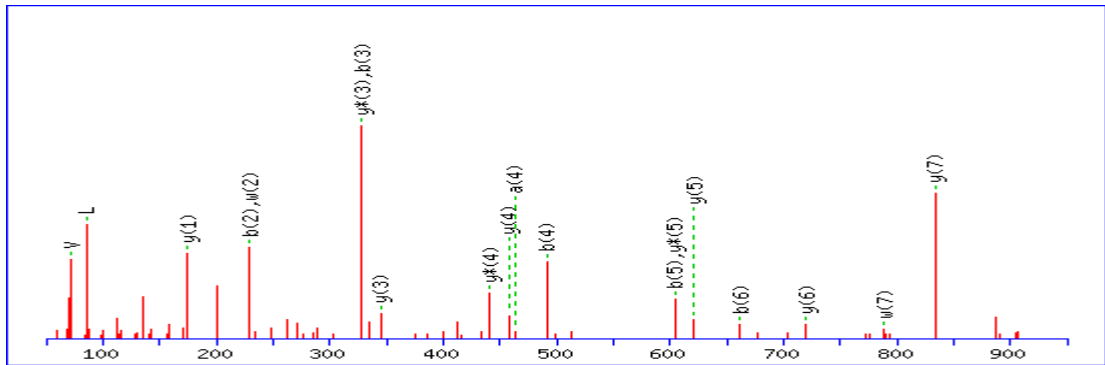

MS/MS Fragmentation of **DHGDLAFVDVPNDSPFQIVK**

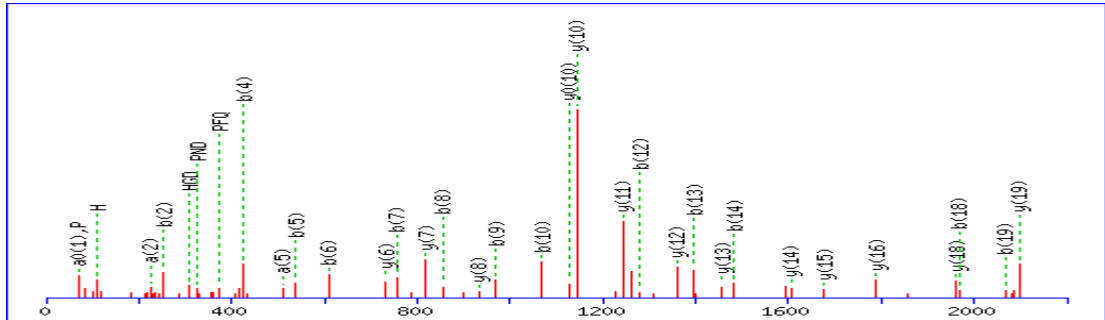

## Spot 564

Match to: IPI00475676 Score: 125 Expect: 1.3e-008

Tax\_Id=10116 Gene\_Symbol=Tas1r2 Delta-1-pyrroline-5-carboxylate dehydrogenase, mitochondrial precur

Nominal mass ( $M_r$ ): 61830; Calculated pI value: 7.14

Sequence Coverage: 26%

Matched peptides shown in **Bold Red**

```
1 MLPPALLRRS LLSYAWRGSG LRWKHASSLK VANEPILAFT QGSPERDALQ
51 KALNDLKDQT EAIPCVMGDE EVWTSQVRYQ LSPFNHGHKV AKFCYADKAL
101 LNKAIEAAVL ARKEWDLKPV ADRAQIFLKA ADMLSGPRRA EILAKTMVGQ
151 GKTVIQAEID AAELIDFFR FNAKFAVELE GEQPISVPPS TNHVVYRGLQ
201 GFVAAISPEN FTAIGGNLAG APALMGNVVL WKPSDTAMLA SYAVYRILRE
251 AGLPPNVIQF VPADGPTFGD TVTSSEHLCG INFTGSVPTF KHLWKQVAQN
301 LDRFRTFPRQ AGECEGKNFH FVHSSADVDS VVSGTLRSAP EYGGQKCSAC
351 SRLYVPQSLW PQIKGRLEE HSRIKVGNPA EDFGTFSSAV IDAKAFARIK
401 KWLEHARSSP SLSILAGGQC NESVGYFVEP CIIESKDPQE PIMKEEIFGP
451 VLTVVYVPE KYRETLQLVD STTSYGLTGA VFAQDKTIVQ EATRMLRNAA
501 GNFYINDKST GSVVGQPPFG GARASGERDI PGQPRVQLW TEPPFTPLAV
551 SPPLGDWRYS YMQ
```

## Probability Based Mowse Score

Ions score is  $-10 \cdot \log(P)$ , where P is the probability that the observed match is a random event.

Protein scores greater than 59 are significant ( $p < 0.05$ ).

Protein scores are derived from ions scores as a non-probabilistic basis for ranking protein hits.

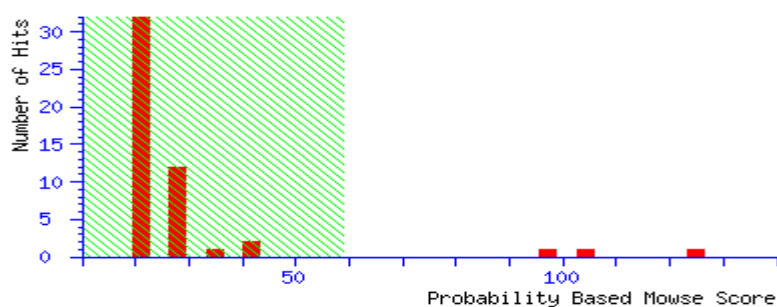

## MS/MS Fragmentation of **STGSVVGQPPFGGAR**

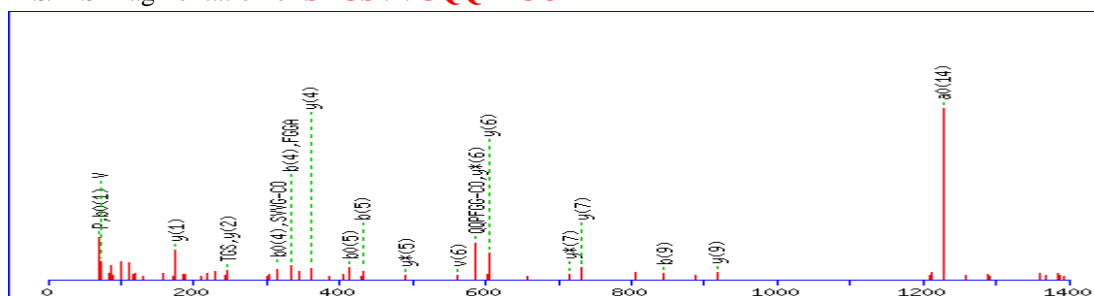

## MS/MS Fragmentation of **VANEPILAFQTGSPER**

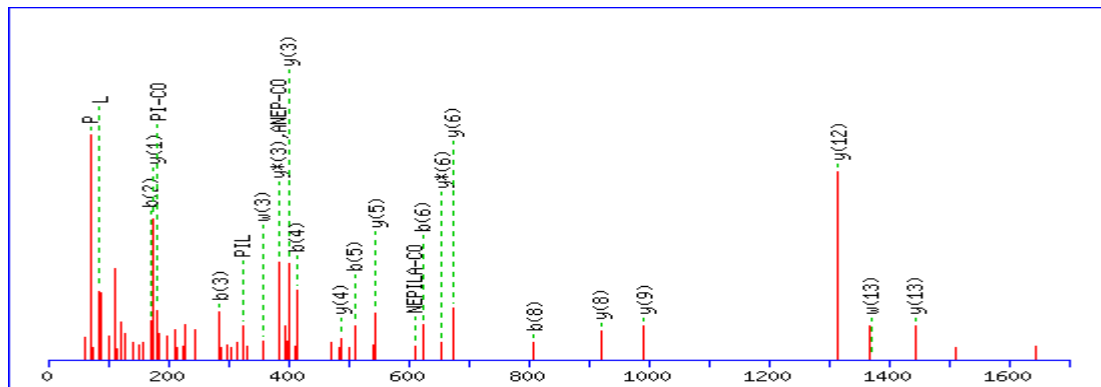

### Spot 1400

Match to: IPI00365297 Score: 290 Expect: 4e-025

Tax\_Id=10116 Gene\_Symbol=Agmat Agmatinase, mitochondrial precursor

Nominal mass ( $M_r$ ): 37963; Calculated pI value: 6.71

Sequence Coverage: 32%

Matched peptides shown in **Bold Red**

```
1 MLQLLKSSWV RSAGSGVVTW RASAGLFCPG TRQASDTSDT LHHSPSPSES
51 QVQPVVRCVM MHLPLQSSPE GLDAAFVGVV LDTGTSNRPG ARFGPRRIRE
101 ESLMLGTVNP STGALPFQSL RVADLGNVNV NLYNLQDSCR LIREAYQNIL
151 ATGCIPLTLG GDHTITYPIL QAVAKEHGPV GLVHVGAAHSN TSDKPLEDKV
201 YHRTPFRRSV DEGLLDKRV VQIGIRGSSR TLDPYRYSRS QGFRVLAED
251 CWMKSLVPLM AEIRQQMGGV PLYISFAIDA LDPAYAPGTG TPEIAGLTPS
301 QALEIIRGCQ GLNVVGCIDL EVSPPYDLSG NTALLAANLL FEMLCALPKV
351 TTV
```

### Probability Based Mowse Score

Ions score is  $-10 \cdot \log(P)$ , where P is the probability that the observed match is a random event.

Protein scores greater than 59 are significant ( $p < 0.05$ ).

Protein scores are derived from ions scores as a non-probabilistic basis for ranking protein hits.



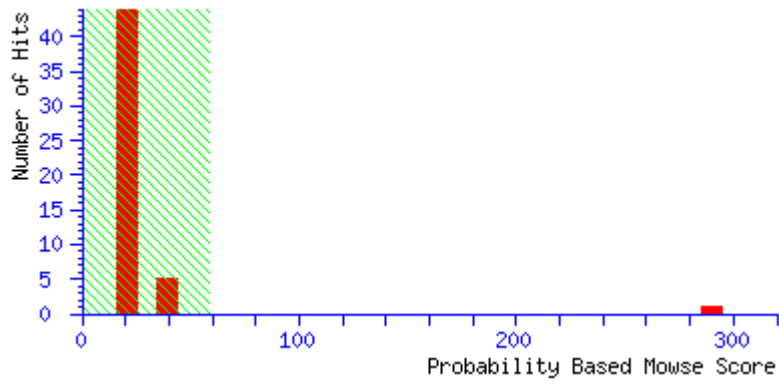

MS/MS Fragmentation of **TLDPYR**

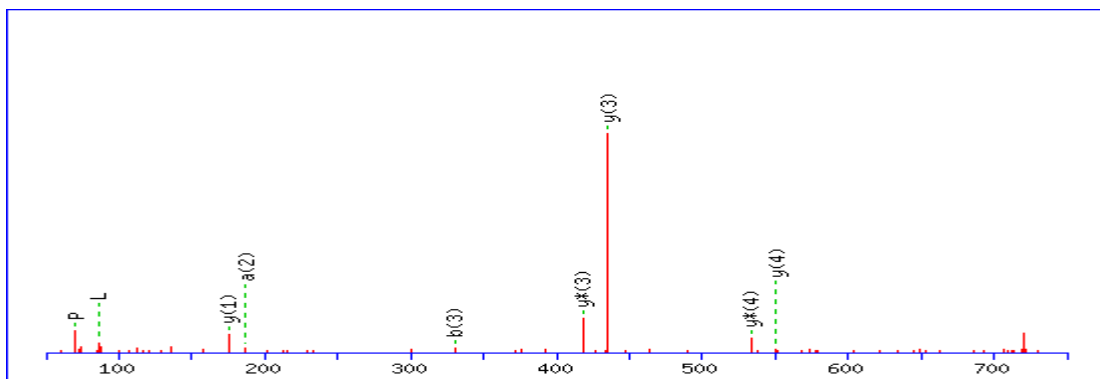

MS/MS Fragmentation of **SLVPLMAEIR**

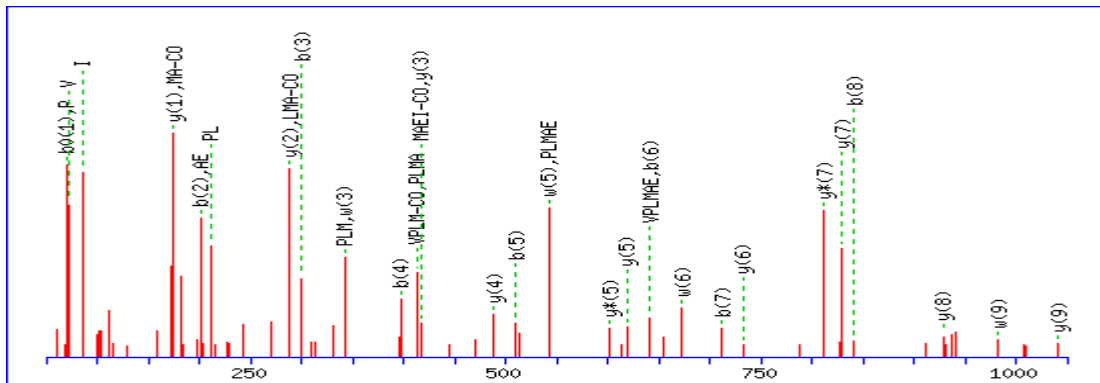

MS/MS Fragmentation of **VVQIGIR**

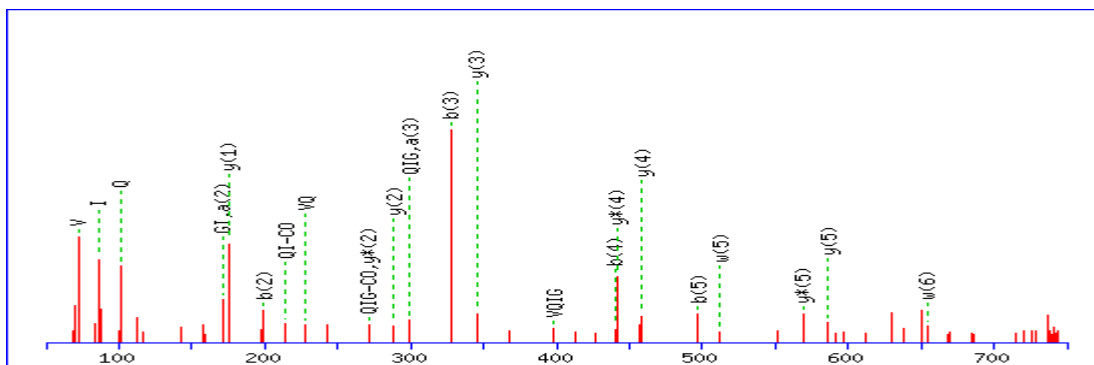

MS/MS Fragmentation of **VADLGNVNVNLYNLQDSCR**

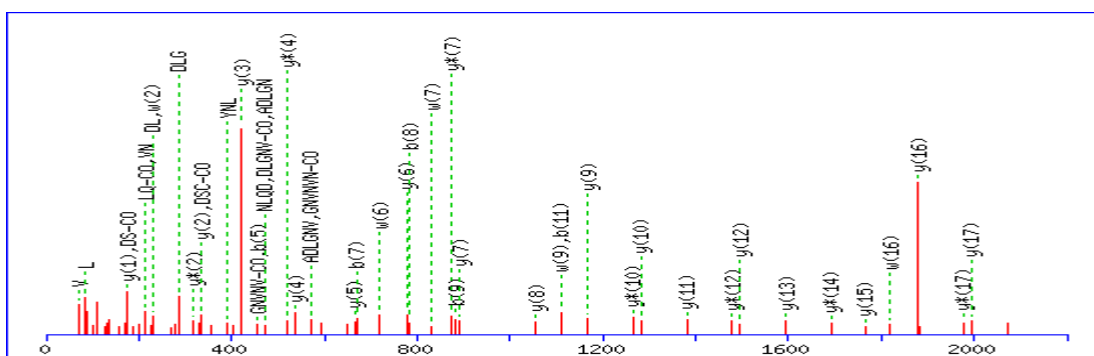

### Spot 560

Match to: IPI00231742 Score: 71 Expect: 0.0031

Tax\_Id=10116 Gene\_Symbol=Cat Catalase

Nominal mass ( $M_r$ ): 59719; Calculated pI value: 7.07

Sequence Coverage: 22%

Matched peptides shown in **Bold Red**

```

1  MADSRPASD QMKQWKEQRA P QKPDVLTG GGNPIGDKLN IMTAGPRGPL
51  LVQDVVFTDE MAHFDRERIP ERVVHAKGAG AFGYFEVTHD ITRYSKAKVF
101 EHIGKRTPIA VRFSTVAGES GSADTVRDPR GFAVKFYTED GNWDLVGNNT
151 PIFFIRDAML FPSFIHSQKR NPQTHLKDPD MWDFWSLCP ESLHQVTFLF
201 SDRGIPDGHR HMNGYGSHTF KLVNANGEAV YCKFHYKTDQ GIKNLPVEEA
251 GRLAQEDPDY GLRDLFNAIA SGNYPSWTFY IQVMTFKEAE TFPFNPFDLT
301 KVWPHKDYPL IPVGKLVLNR NPANYFAEVE QMAFDPSNMP PGIESPDKM
351 LQGRLFAYPD THRHRLGPNY LQIPVNCPYR ARVANYQRDG PMCMHDNQGG
401 APNYYPNSFS APEQQGSALE HHSQCSADVK RFNSANEDNV TQVRTFYTKV
451 LNEEERKRLC ENIANHLKDA QLFIQRKAVK NFTDVHPPDYG ARVQALLDQY
501 NSQKPKNAIH TYVQAGSHIA AKGKANL
  
```

### Probability Based Mowse Score

Ions score is  $-10 \cdot \log(P)$ , where P is the probability that the observed match is a random event.

Protein scores greater than 59 are significant ( $p < 0.05$ ).

Protein scores are derived from ions scores as a non-probabilistic basis for ranking protein hits.

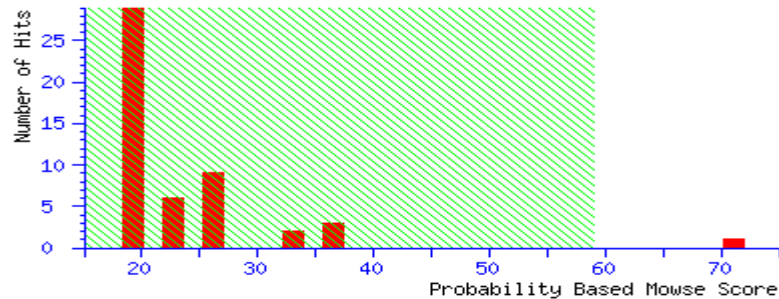

### MS/MS Fragmentation of **LGPNYLQIPVNC**PYR

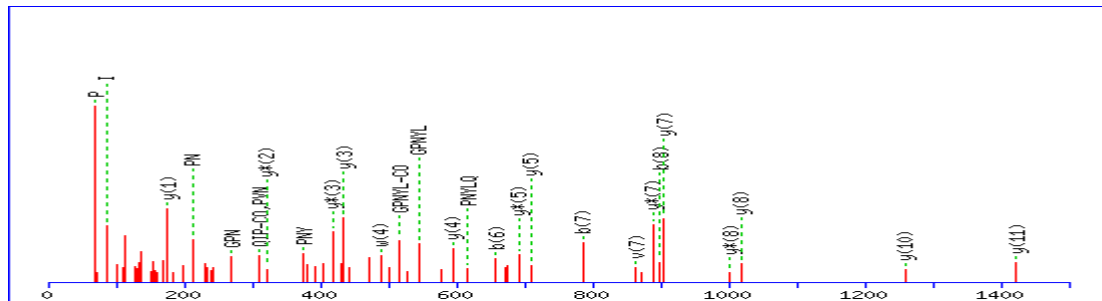

### Spot 527

Match to: IPI00327469 Score: 101 Expect: **3.2e-006**

Tax\_Id=10116 Gene\_Symbol=Ahsg Alpha-2-HS-glycoprotein precursor

Nominal mass ( $M_r$ ): **37958**; Calculated pI value: **6.05**

Sequence Coverage: **21%**

Matched peptides shown in **Bold Red**

```
1 MKSLVLLLCF AQLWSCQSAP QGAGLGFREL ACDDPETEHV ALIAVDYLNK
51 HLLQGFRQIL NQIDKVKVWS RRPFGEVYEL EIDTLETTCH ALDPTPLANC
101 SVRQQAETHAV EGDCDFHILK QDQQFRVLHA QCHSTPDSAE DVRKFCPRCP
151 ILIRFNDTNV VHTVKTALAA FNAQNNGTYF KLVEISRAQN VFPVSTLVE
201 FVIAATDCTG QEVTDPAKCN LLAEKQYGFC KATLIHRLGG EEVSVACKLF
251 QTQPAPANAN PAGPAPTVGQ AAPVAPPAGP PESVVGPVA VPLGLPDHRT
301 HHDLRHAFSP VASVESASGE VLHSPKVGQP GDAGAAGPVA PLCPGRVRYF
351 KI
```

### Probability Based Mowse Score

Ions score is  $-10 \cdot \log(P)$ , where P is the probability that the observed match is a random event.

Protein scores greater than 59 are significant ( $p < 0.05$ ).

Protein scores are derived from ions scores as a non-probabilistic basis for ranking protein hits.

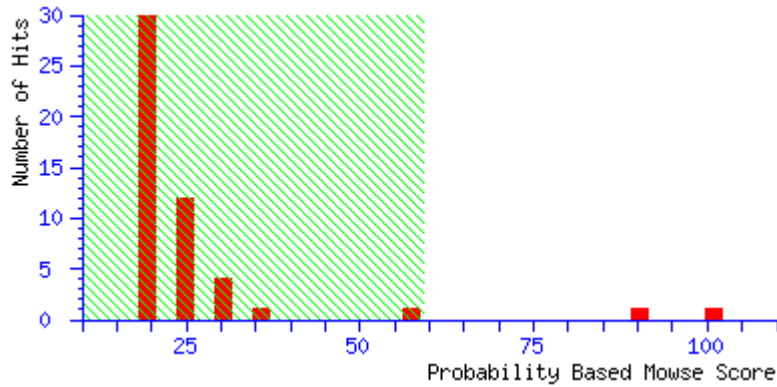

MS/MS Fragmentation of **VGQPGDAGAAGPVAPLCPGR**

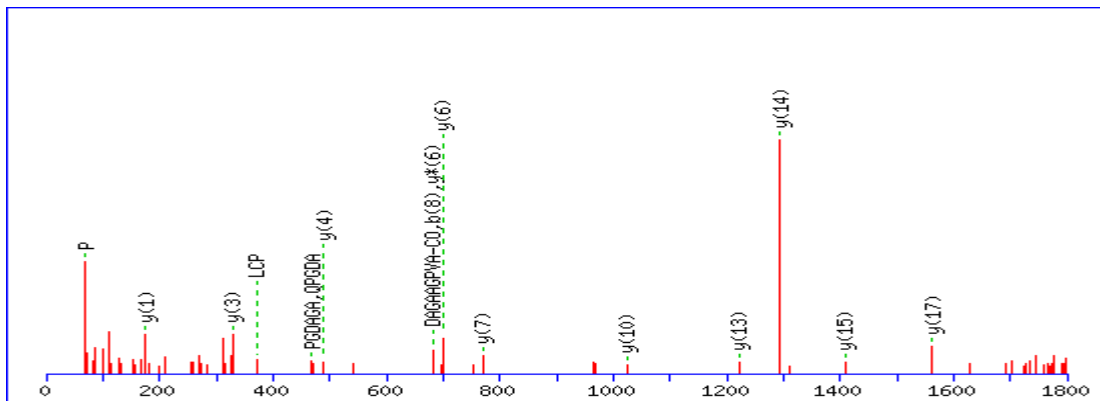

**Spot 543**

Match to: IPI00206624 Score: 206 Expect: 1e-016

Tax\_Id=10116 Gene\_Symbol=Hspa5 78 kDa glucose-regulated protein precursor

Nominal mass ( $M_r$ ): 72302; Calculated pI value: 5.07

Sequence Coverage: 41%

Matched peptides shown in **Bold Red**

1 MKFTVVAAL LLLCAVRAEE EDKKEDVGTV VGIDLGTTYS CVGVFKNGRV  
 51 **EIIANDQGNR** **ITPSYVAFTP** **EGERLIGDAA** KNQLTSNPEN TVFDAKRLIG  
 101 **RTWNDPSVQQ** **DIKFLPFKVV** **EKKTkPYIQV** **DIGGGQTKTF** APEEISAMVL  
 151 TKMKETAAY LGKK**VTHAVV** **TVPAYFNDAQ** **RQATKDAGTI** **AGLNMRIIN**  
 201 **EPTAAAIAYG** **LDKREGEKNI** LVFDLGGGTF DVSLTIDNG VFEVVATNGD  
 251 THLGGEFDQ RVMEHFIKLY KKKTGKDVRK DN**RAVQKLRR** EVEKAK**RALS**  
 301 **SQHQARIEIE** **SFFEGEDFSE** **TLTRAKFEEL** **NMDLFRSTMK** **PVQK**VLESD  
 351 **LKKSIDEIV** **LVGSTRIPK** **IQQLVKEFFN** **GKEPSRGINP** DEAVAYGAAV  
 401 QAGVLSGDQD TGDVLLDVC PLTLGIETVG GVMTKLIPRN **TVVPTKKSQI**  
 451 FSTASDNQPT VTIK**VYEGER** **PLTKDNHLLG** **TFDLTGIPPA** **PRGVPQIEVT**  
 501 **FEIDVNGILR** VTAEDKGTGN KNKITITNDQ **NRLTPEEIER** MVNDAEKFAE  
 551 EDKCLKERID TRNELESYAY SLKNQIGDKE **KLGGKLSPED** **KETMEKAVEE**  
 601 **KIEWLESHQD** **ADIEDFKAKK** KELEEIVQPI ISKLYGSSGP PPTGEEDTSE  
 651 KDEL

## Probability Based Mowse Score

Ions score is  $-10 \cdot \log(P)$ , where  $P$  is the probability that the observed match is a random event.

Protein scores greater than 59 are significant ( $p < 0.05$ ).

Protein scores are derived from ions scores as a non-probabilistic basis for ranking protein hits.

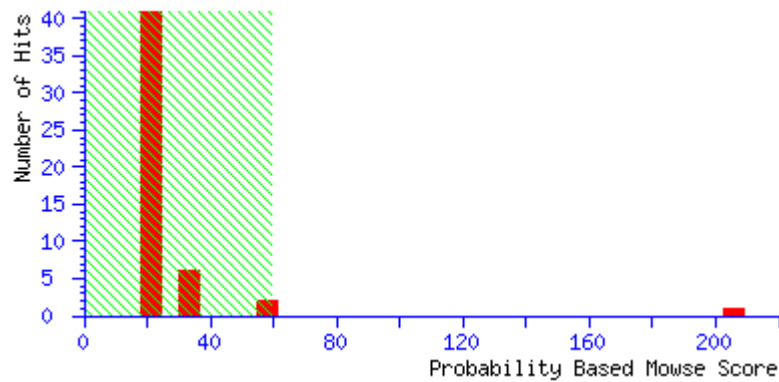

### MS/MS Fragmentation of **DNHLLGTFDLTGIPPAPR**

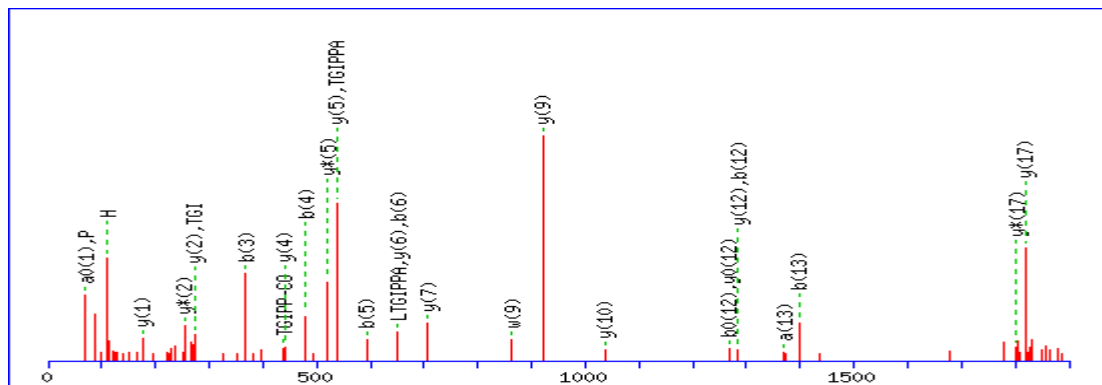

### MS/MS Fragmentation of **VTHAVVTVPAYFNDAQR**

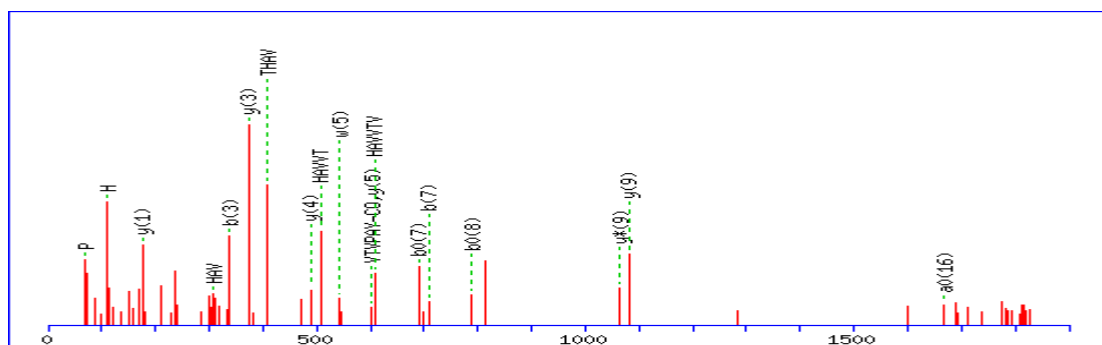

### MS/MS Fragmentation of **ITPSYVAFTPEGER**

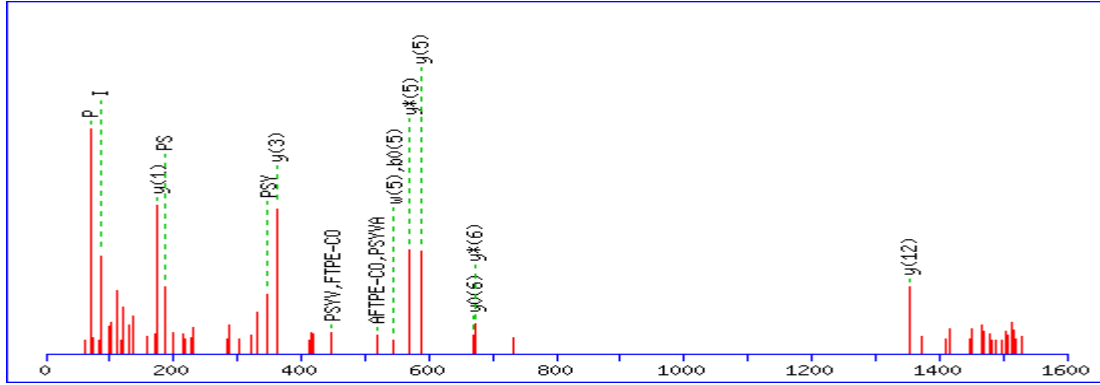

### Spot 1514

Match to: IPI00230788 Score: 468 Expect: 6.4e-043

Tax\_Id=10116 Gene\_Symbol=Ca3 Carbonic anhydrase 3

Nominal mass ( $M_r$ ): 29413; Calculated pI value: 6.89

Sequence Coverage: 85%

Matched peptides shown in **Bold Red**

1 **MAKEWGYASH NGPEHWHELY PIAKGDNQSP IELHTKDIRH DPSLQPWSVS**  
 51 **YDPGSAKTIL** NGKTCRVVF DDTFDRSMLR **GGPLSGPYRL RQFHLHWGSS**  
 101 **DDHGSEHTVD GVKYAAELHL VHWNPKYNTF GEALKQPDGI AVVGIFLKIG**  
 151 **REKGEFQILL DALDKIKTKG KEAPFNHFDP SCLFPACRDY WTYHGSFTTP**  
 201 **PCEECIVWLL LKEPMTVSSD QMAKLRSLFA SAENEPPVPL VGNWRPPQPI**  
 251 **KGRVVRASFK**

### Probability Based Mowse Score

Ions score is  $-10 \cdot \log(P)$ , where P is the probability that the observed match is a random event.

Protein scores greater than 59 are significant ( $p < 0.05$ ).

Protein scores are derived from ions scores as a non-probabilistic basis for ranking protein hits.

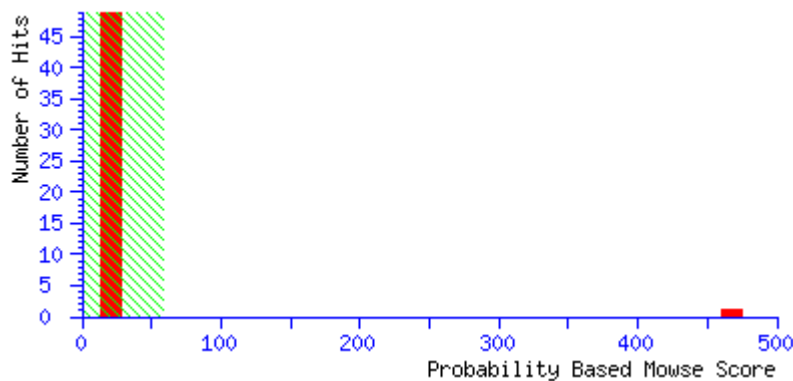

MS/MS Fragmentation of **SLFASAENEPPVPLVGNWRPPQPIK**

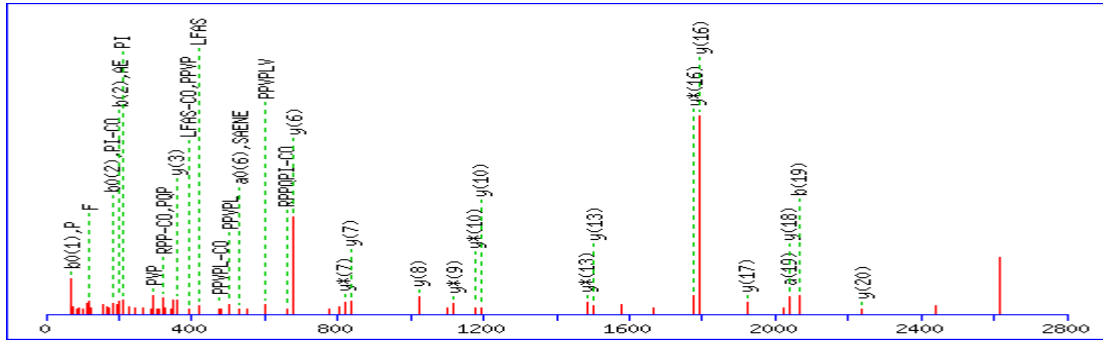

MS/MS Fragmentation of **EAPFNHFDPSCLFPACR**

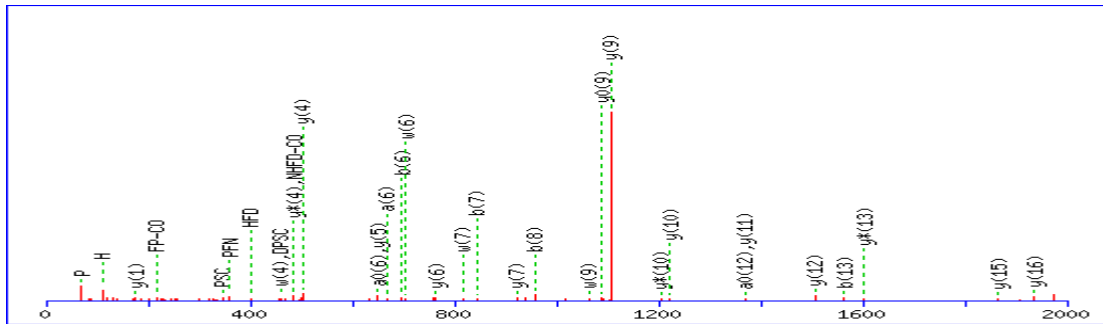

MS/MS Fragmentation of **YAAELHLVHWNPk**

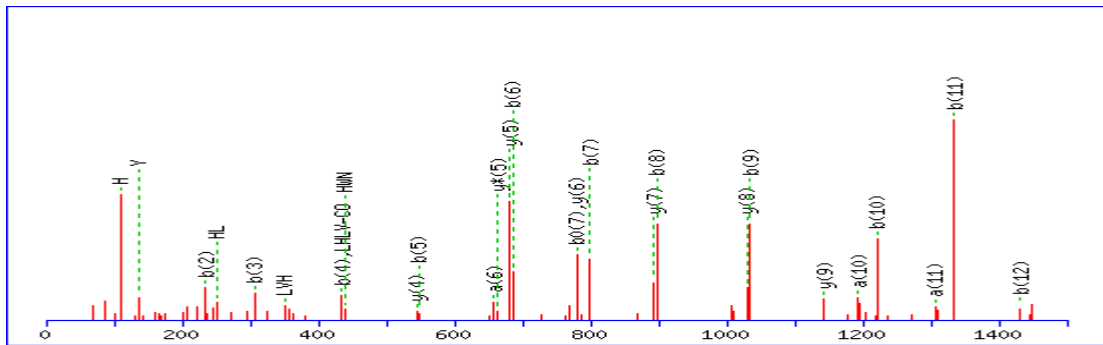

MS/MS Fragmentation of **GGPLSGPYR**

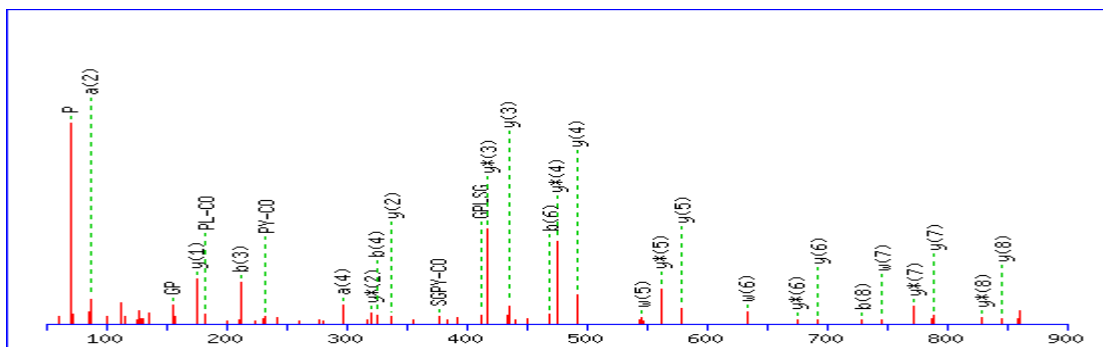

MS/MS Fragmentation of **VVFDDTFDR**

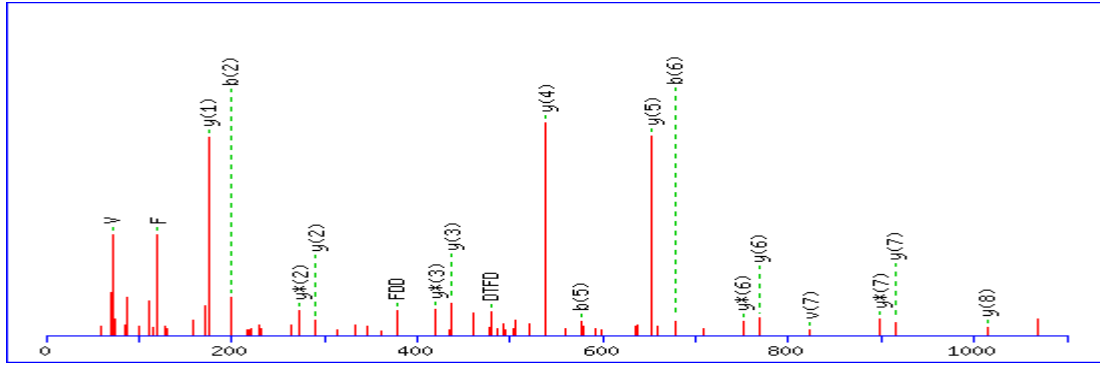

### Spot 799

Match to: IPI00389571 Score: 465 Expect: 1.3e-042

Tax\_Id=10116 Gene\_Symbol=Krt2-8 Keratin, type II cytoskeletal 8

Nominal mass ( $M_r$ ): 53985; Calculated pI value: 5.83

Sequence Coverage: 55%

Matched peptides shown in **Bold Red**

```

1 MSVRVTQKSY KMSTSGPRAF SSRSFTSGPG ARISSSSF SR VGSSSSFRG
51 SLGGFGGAGV GGITAVTVNQ SLLNPLKLEV DPNIQAVRTQ EKEQIKTLNN
101 KFASFIDKVR FLEQQNKMLE TKWSSLQQQK TSRSNMDNMF ESYINNLRRQ
151 LEALGQEKLK LEVELGNMQG LVEDFKNKYE DEINKRTEME NEFVLIKKDV
201 DEAYMNKVEL ESRLEGLTDE INFLRQIHEE EIRELQSQIS DTSVVLSDMN
251 SRSLDMSII AEVRAQYEEI ANRSRAEAET MYQIKYEELQ TLAGKHGDDL
301 RRSKTEISEM NRNISR LQAE IDALKGQRAT LEAAIADAEQ RGELAVKDAN
351 AKLEDLKNAL QKAKQDMARQ LREYQELMNV KLALDIEIAT YRKLLEGEES
401 RLESGMQNMS IHTKTTSGYA GGLSSSYGGL TSPGFSYGMS SFQPGFGSVG
451 GSSTYSRTKA VVVKKIETRD GKLVSSESDI MSK

```

### Probability Based Mowse Score

Ions score is  $-10 \cdot \log(P)$ , where P is the probability that the observed match is a random event.

Protein scores greater than 59 are significant ( $p < 0.05$ ).

Protein scores are derived from ions scores as a non-probabilistic basis for ranking protein hits.



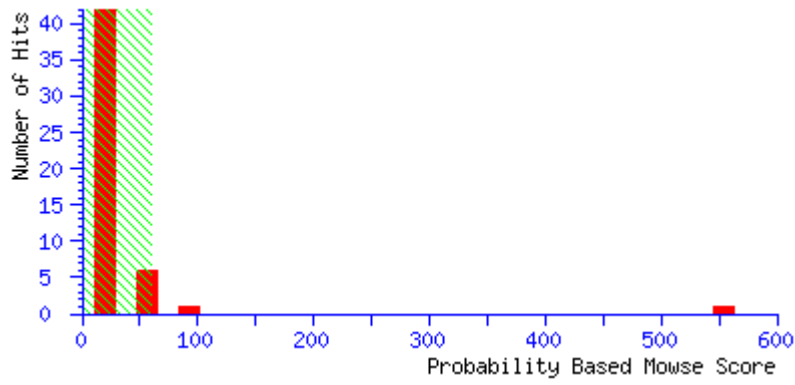

MS/MS Fragmentation of **LALDIEIATYR**

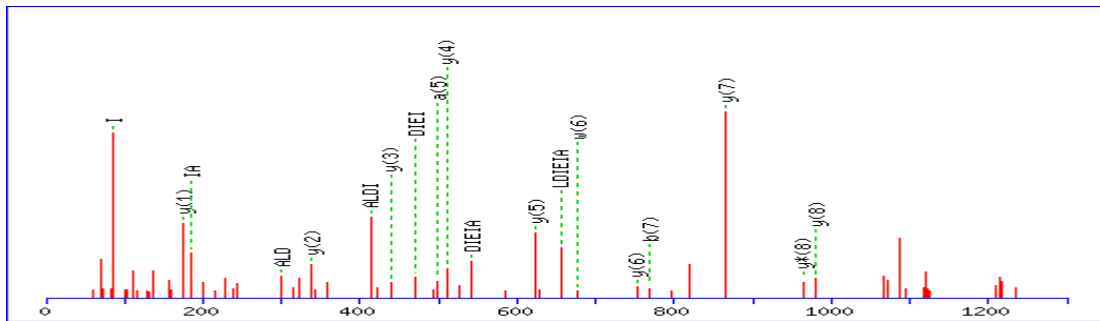

MS/MS Fragmentation of **LQAEIDALKGQR**

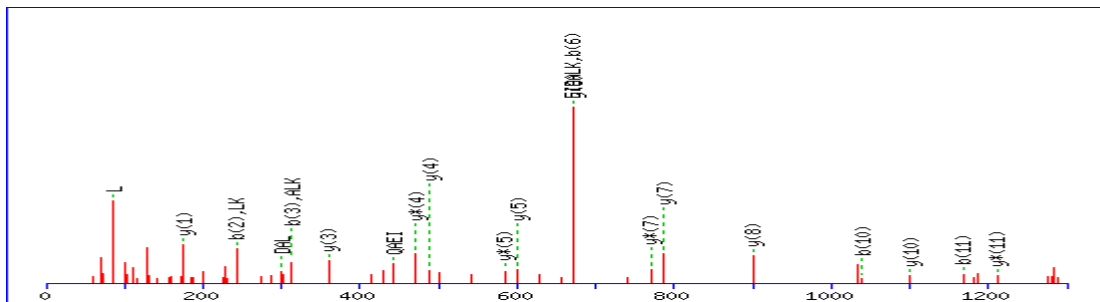

MS/MS Fragmentation of **LEGLTDEINFLR**

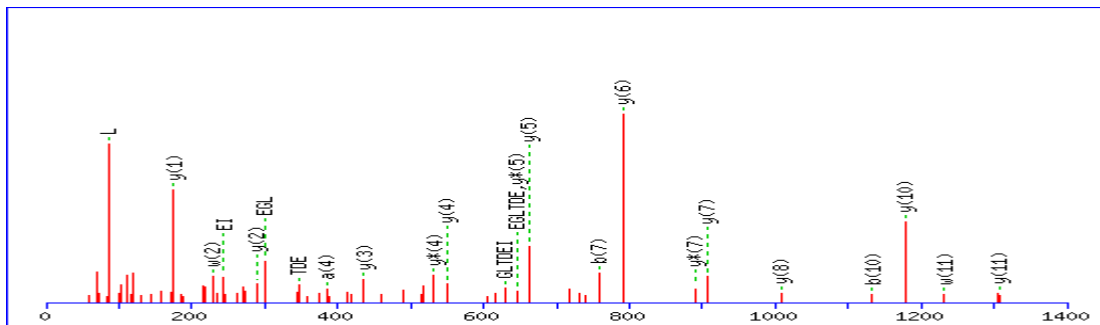

### Spot 1662

Match to: IPI00561017 Score: 488 Expect: 6.4e-045

Tax\_Id=10116 Gene\_Symbol=Prdx5 22 kDa protein

Nominal mass ( $M_r$ ): 22255; Calculated pI value: 8.54

Sequence Coverage: 55%

Matched peptides shown in **Bold Red**

1 MVQLRFCVLG SIAGSVLRAS **ATWTCVAGRA** GRKGAGWECG GARSFSSRGD  
51 YGPDQGVGDT IPSVEVFEGE PGK**KVNLAEL** **FKDKKGVLFG** **VPGAFTPGCS**  
101 **KTHLPGFVEQ** **AGALKAKGAQ** **VVACLSVNDV** **FVTAEWGRAH** **QAEQKVQLLA**  
151 **DPTGAFGKET** **LLLLDDSLVS** **LFGNRRLKRF** **SMVIDKGVVK** ALNVEPDGTG  
201 LTCSLAPNIL SQL

### Probability Based Mowse Score

Ions score is  $-10 \cdot \log(P)$ , where P is the probability that the observed match is a random event.

Protein scores greater than 59 are significant ( $p < 0.05$ ).

Protein scores are derived from ions scores as a non-probabilistic basis for ranking protein hits.

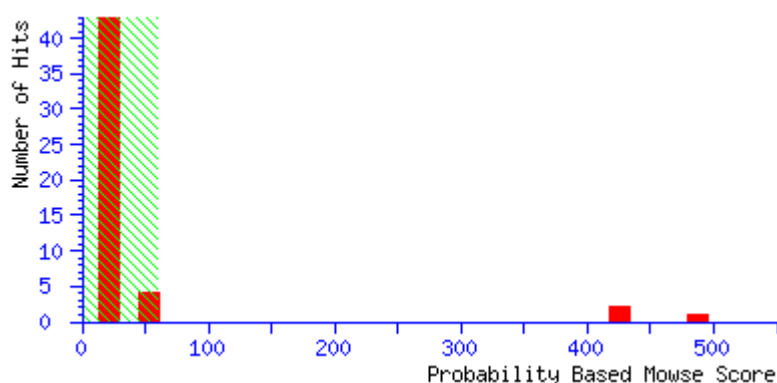

### MS/MS Fragmentation of **ETDLLLDDSLVSLFGNR**

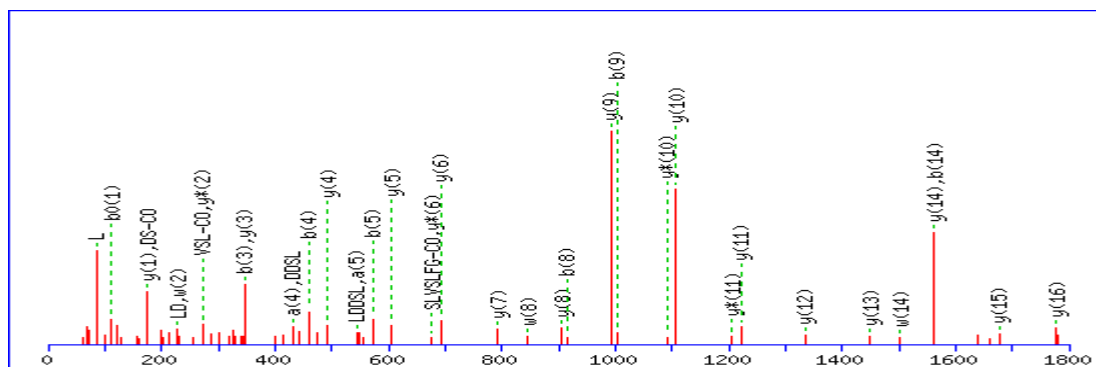

### MS/MS Fragmentation of **GAQVVACLSVNDVFVTAEWGR**

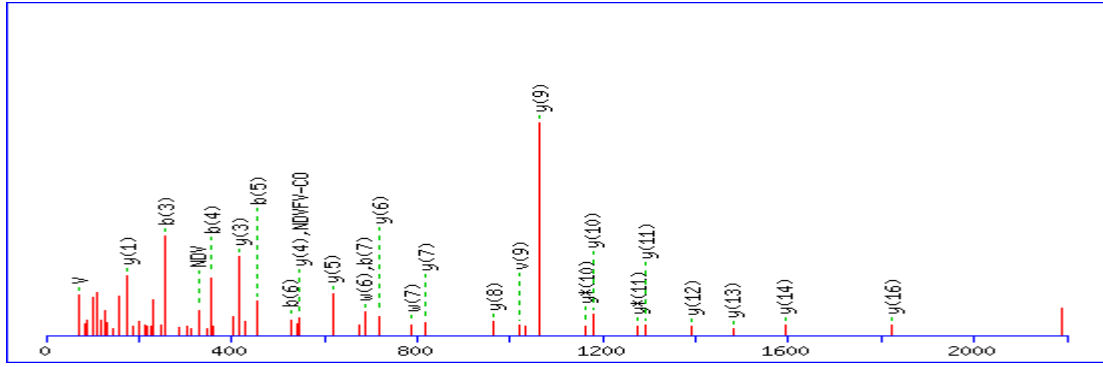

MS/MS Fragmentation of **THLPGFVEQAGALK**

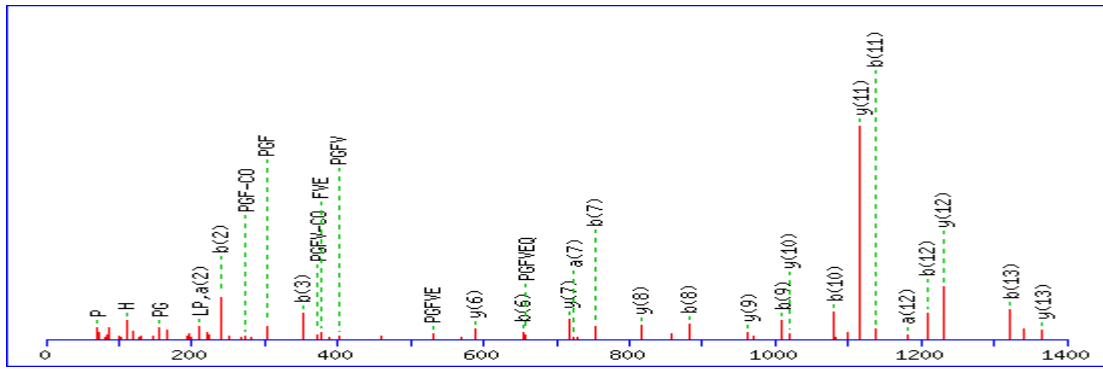

MS/MS Fragmentation of **GVLEFGVPGAFTPGCSK**

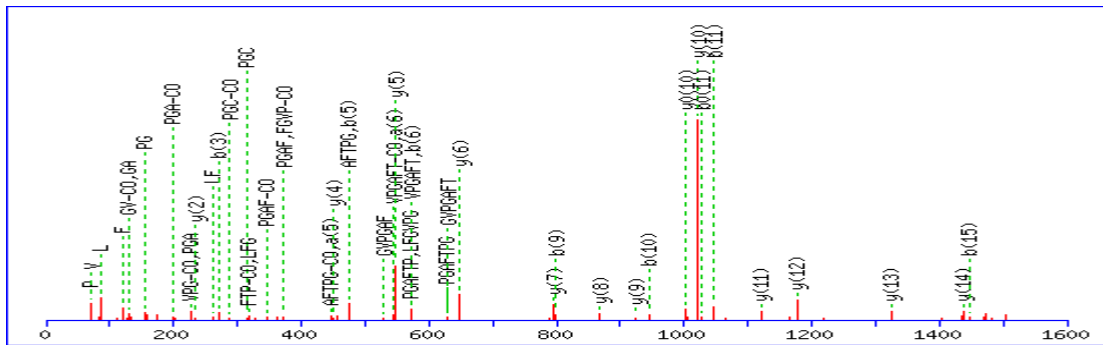

### Spot 1526

Match to: IPI00760117 Score: 143 Expect: 2e-010

Tax\_Id=10116 Gene\_Symbol=Comt Isoform 2 of Catechol O-methyltransferase

Nominal mass (M<sub>r</sub>): 24731; Calculated pI value: 5.11

Sequence Coverage: 55%

Matched peptides shown in **Bold Red**

1 MGDTKEQRIL RYVQQNAKPG DPQSVLEAID TYCTQKEWAM NVGDAK**GQIM**  
51 **DAVIREYSPS LVLELGAYCG YSAVRMARLL QPGARLLTME** MNPDYAAITQ  
101 QMLNFAGLQD **KVTILNGASQ DLIPQLKKKY** DVDTLDMVFL DHWK**DRYLPD**  
151 **TLLLEKCGLL RKGTVLLADN VIVPGTPDFL AYVRGSSSFE** CTHYSSYLEY  
201 **MKVVDGLEKA IYQGPSSPK S**

### Probability Based Mowse Score

Ions score is  $-10 \cdot \log(P)$ , where P is the probability that the observed match is a random event.

Protein scores greater than 59 are significant ( $p < 0.05$ ).

Protein scores are derived from ions scores as a non-probabilistic basis for ranking protein hits.

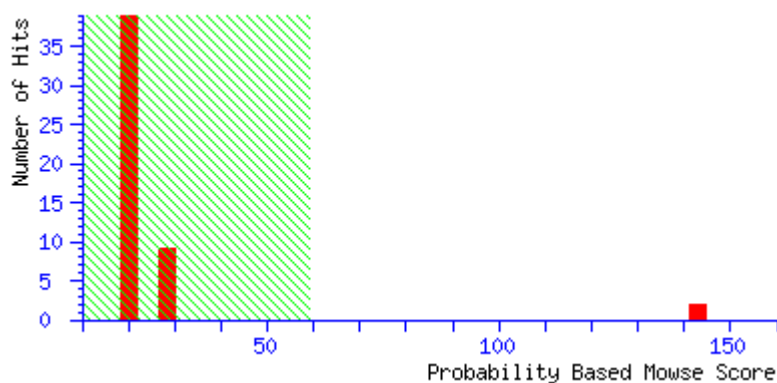

### MS/MS Fragmentation of **LLQPGAR**

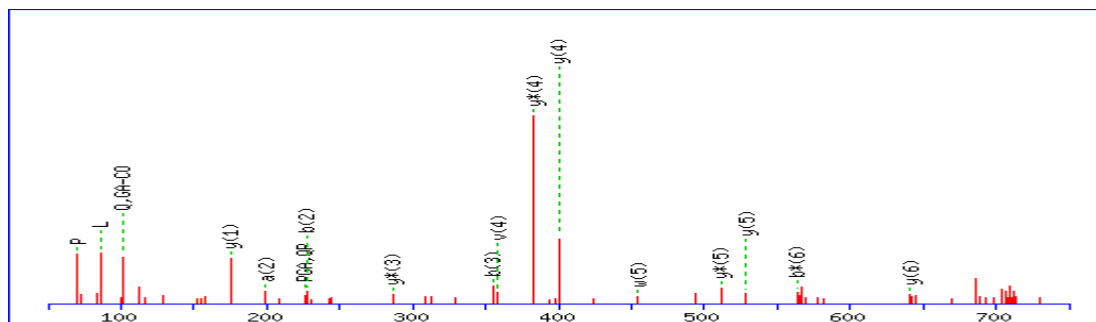

### MS/MS Fragmentation of **EYSPSLVLELGAYCGYSAVR**

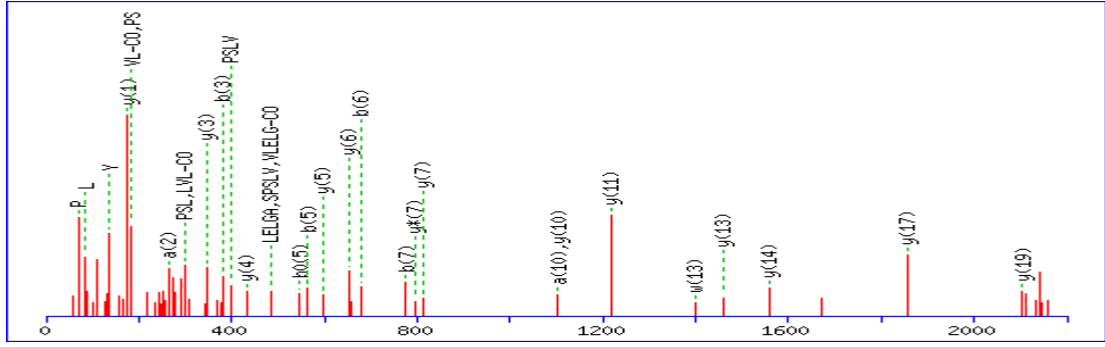

### Spot 1563

Match to: IPI00392676 Score: 233 Expect: 2e-019

Tax\_Id=10116 Gene\_Symbol=BlvrB\_predicted biliverdin reductase B

Nominal mass ( $M_r$ ): 22083; Calculated pI value: 6.29

Sequence Coverage: 62%

Matched peptides shown in **Bold Red**

1 MAVKKIAIFG **ATGRTGLTTL** AQASPSSYEV TVLVRDSSRL **PSEGPQPAHV**  
51 **VVGDLVQAGD** **VDKTVAGQDA** **VIVLLGTGND** **LSPTTVMSEG** **TRNIVAAMKA**  
101 HGVDKVVACT SAFLLWDPSK VPPRL**QDVTD** **DHIRMHKILE** **ESGLKYVAVM**  
151 **PPHIGDQPLT** **GAYTVTL DGR** GPSRVISKHD LGHFMLRCLT **THEYDGQKTY**  
201 PSHQYD

### Probability Based Mowse Score

Ions score is  $-10 \cdot \log(P)$ , where P is the probability that the observed match is a random event.

Protein scores greater than 59 are significant ( $p < 0.05$ ).

Protein scores are derived from ions scores as a non-probabilistic basis for ranking protein hits.

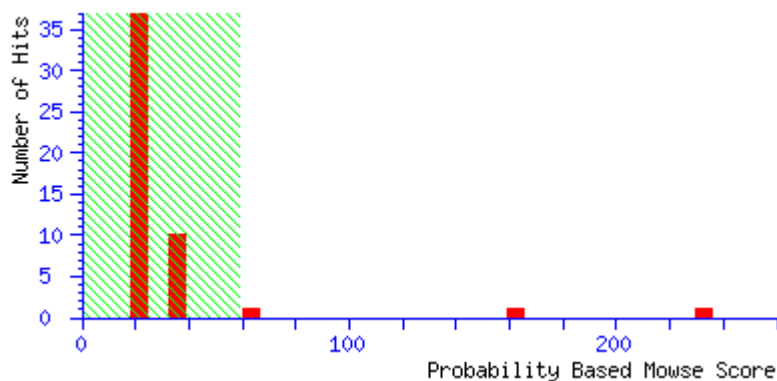

### MS/MS Fragmentation of **HDLGHFMLR**

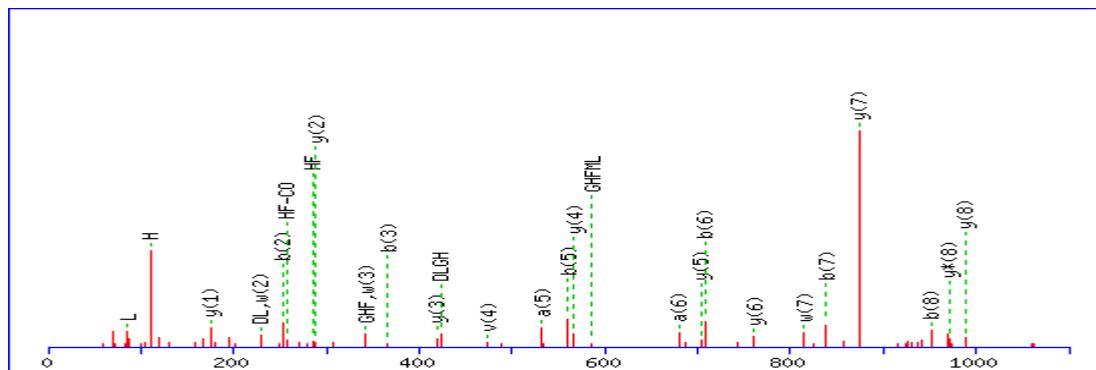

### MS/MS Fragmentation of **YVAVMPPHIGDQPLTGAYTVTL DGR**

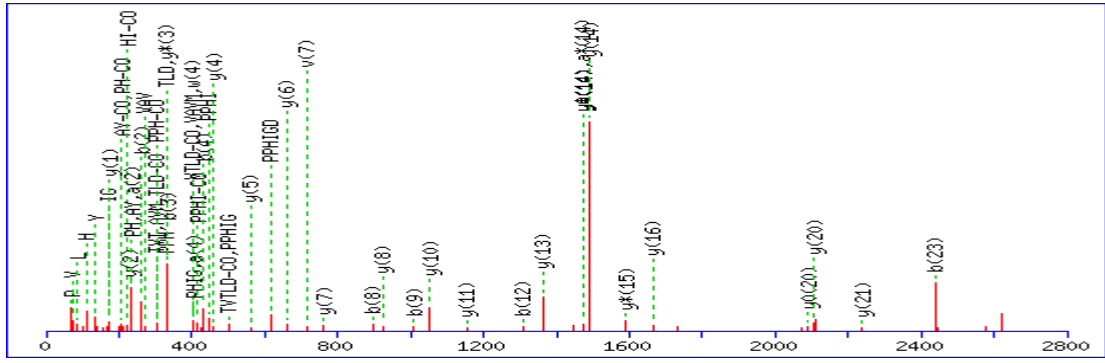

MS/MS Fragmentation of **IAIFGATGR**

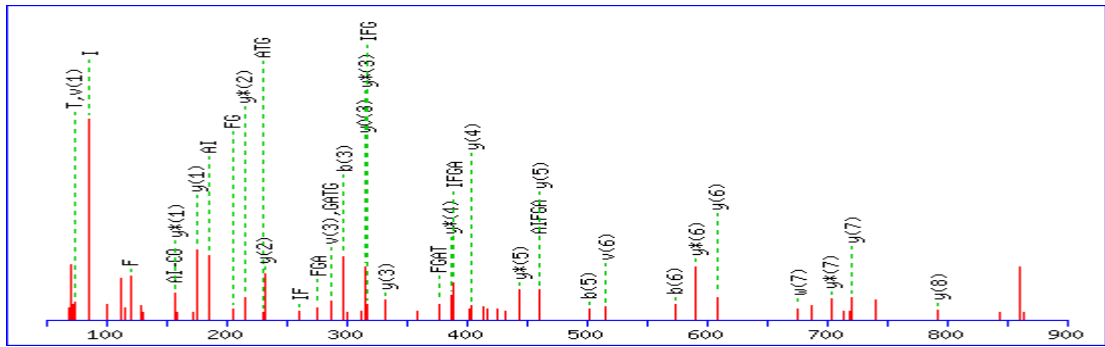

## Spot 1746

Match to: IPI00205036 Score: 534 Expect: 1.6e-049

Tax\_Id=10116 Gene\_Symbol=LOC360504 hemoglobin alpha 2 chain

Nominal mass ( $M_r$ ): 15275; Calculated pI value: 8.45

Sequence Coverage: 88%

Matched peptides shown in **Bold Red**

1 **MVLSAADKTN IKNCWKGIGG HGGEYGEEAL QRMFAAFPTT KTYFSHIDVS**  
51 **PGSAQVKAHG KKVADALAKA ADHVEDLPGA LSTLSDLHAH KLRVDPVNFK**  
101 **FLSHCLLVTL ACHHPGDFTP AMHASLDKFL ASVSTVLTSK YR**

## Probability Based Mowse Score

Ions score is  $-10 \cdot \log(P)$ , where P is the probability that the observed match is a random event.

Protein scores greater than 59 are significant ( $p < 0.05$ ).

Protein scores are derived from ions scores as a non-probabilistic basis for ranking protein hits.

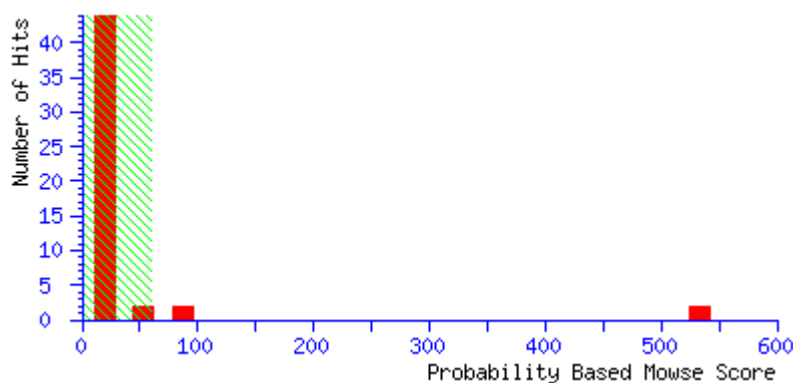

## MS/MS Fragmentation of **IGGHGGEYGEEALQR**

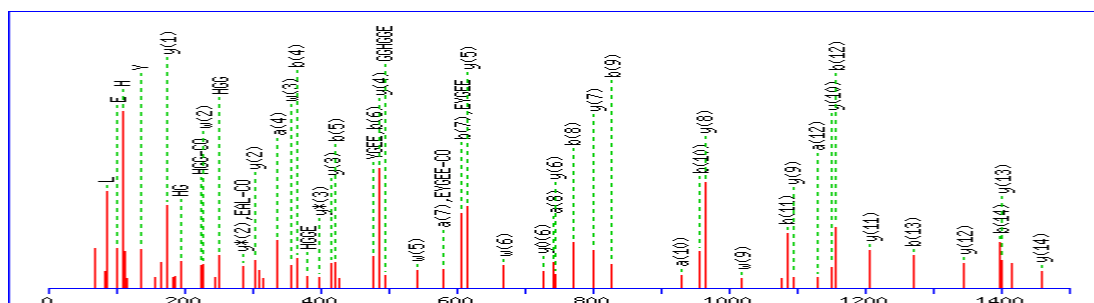

## MS/MS Fragmentation of **TYFSHIDVSPGSAQVK**



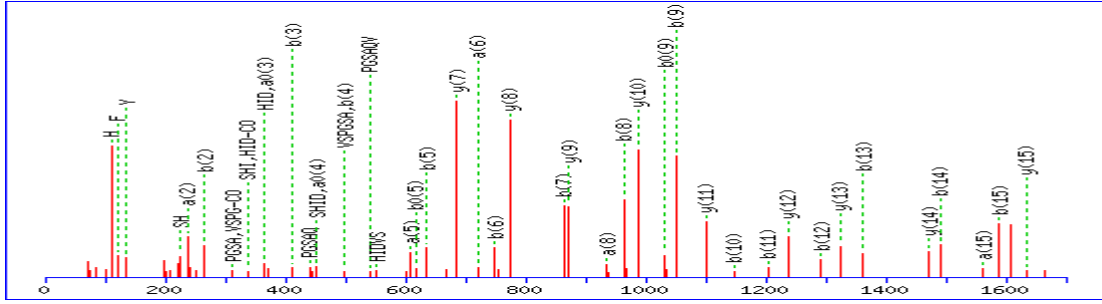

MS/MS Fragmentation of **AAHVEDLPGALSTLSDLHAHK**

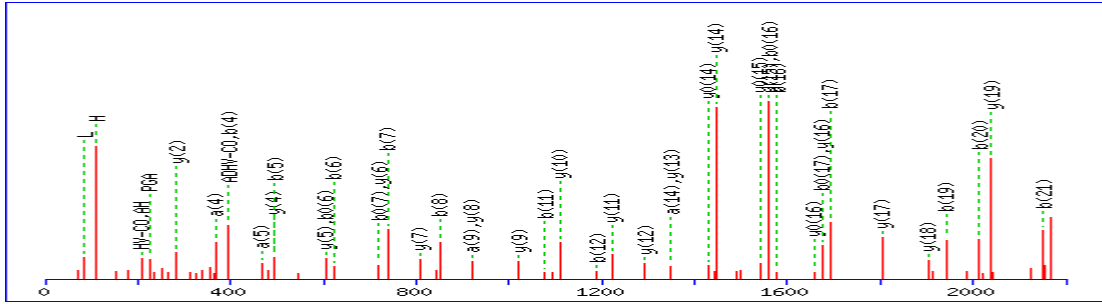

MS/MS Fragmentation of **LRVDPVNFK**

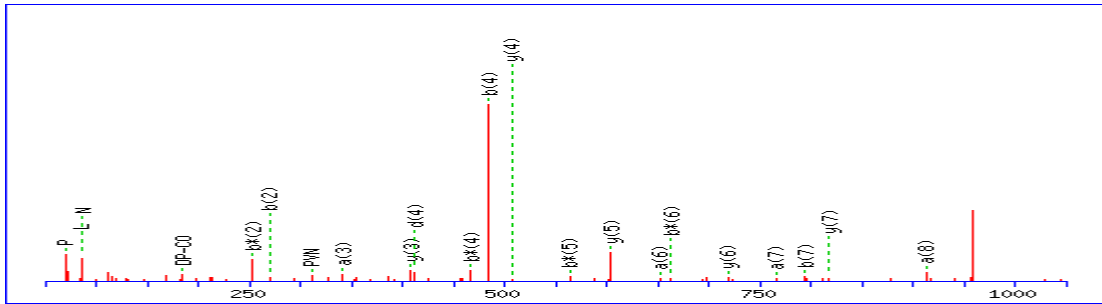

### Spot 1453

Match to: IPI00231106 Score: 405 Expect: 1.3e-036

Tax\_Id=10116 Gene\_Symbol=Mpst 3-mercaptopyruvate sulfurtransferase

Nominal mass ( $M_r$ ): 32919; Calculated pI value: 5.88

Sequence Coverage: 57%

Matched peptides shown in **Bold Red**

1 MAAPQLFRAL **VSAQWVAEAL KSPRASQPLK LLDASWYLPK** LGRDARREFE  
51 **ERHIPGAFF DIDRCSDHTS** PYDHMLPSAT HFADYAGSLG VSAATHVVIY  
101 DGSDQGLYSA PRVWWMFRAF **GHHSVLLDG GFRYWLSQNL PISSGKSPSE**  
151 **PAEFCAQLDP SFIKTHEDIL ENLDARRFQV VDARAAGRFG GTQPEPRDGI**  
201 **EPGHIPGSVN IPFTEFLTSE GLEKSPEEIQ** RLFQEKKVDL SKPLVATCGS  
251 GVTACHVVLG AFLCGKPDVP VYDGSWVEWY MRA**QPEHVIS QGRGKTL**

### Probability Based Mowse Score

Ions score is  $-10 \cdot \log(P)$ , where P is the probability that the observed match is a random event.

Protein scores greater than 59 are significant ( $p < 0.05$ ).

Protein scores are derived from ions scores as a non-probabilistic basis for ranking protein hits.

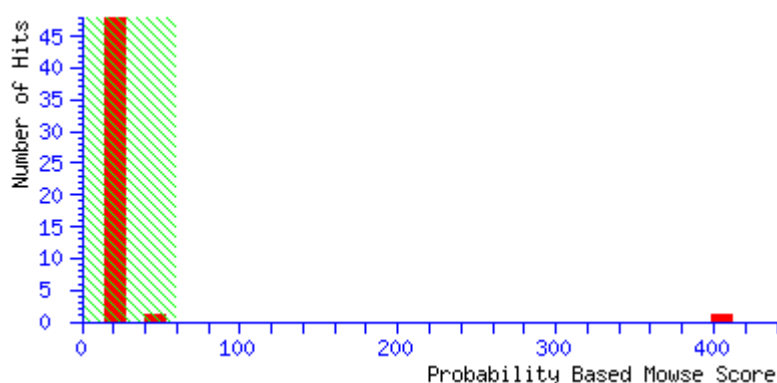

### MS/MS Fragmentation of **AQPEHVISQGR**

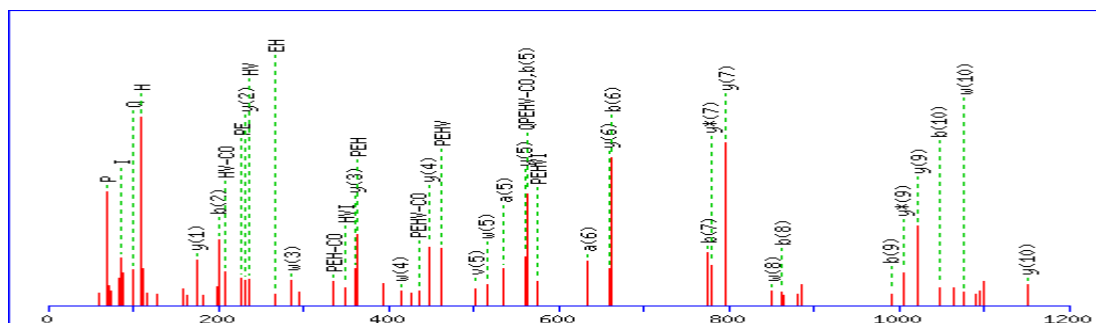

### MS/MS Fragmentation of **FQGTQPEPR**

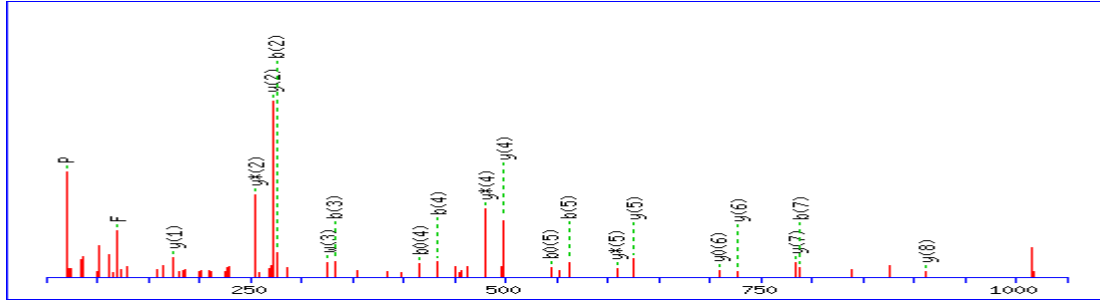

MS/MS Fragmentation of **AFGHHSVSLLDGGFR**

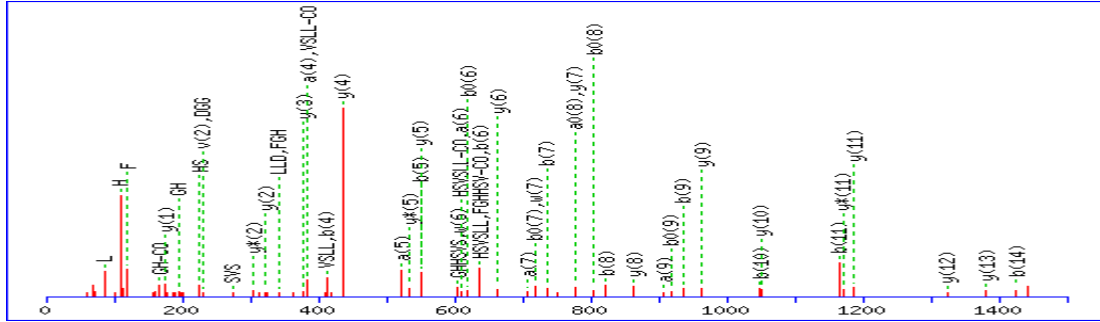

MS/MS Fragmentation of **HIPGAAFFDIDR**

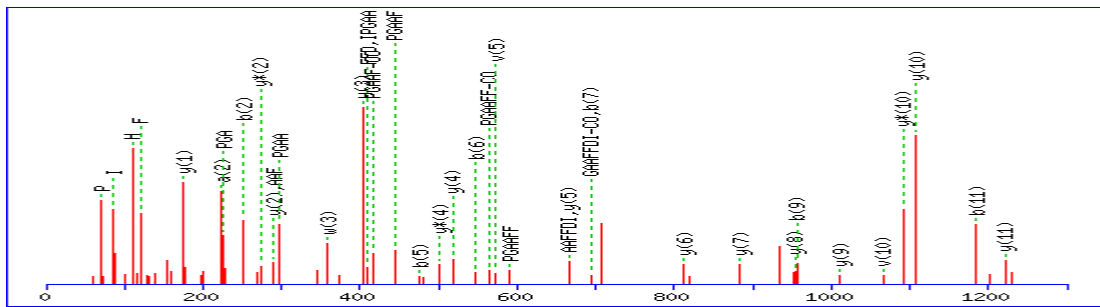

Supplement: tox-32-223-s002.pdf [file tox-32-223-s002.pdf]
