# Supplementary material for: Proteomics approach to investigate dynamic protein profile involved in high fat diet-induced fatty liver disease in rats
Source: PubMed Central journal article supplement — J Toxicol Pathol. 2019 Mar 19;32(4):223–32. doi: 10.1293/tox.2018-0045 (PMC6831498; doi:10.1293/tox.2018-0045), 2019-03-19
Supplement: tox-32-223-s001.pdf [file tox-32-223-s001.pdf]

**Table S1.** Proteins identified by 2-D DIGE and MALDI-TOF-TOF

| Spot No <sup>a</sup>           | IPI No      | Protein description                           | P-Value ID <sup>b</sup> | Mr (Da) | PI   | Coverage (%) <sup>c</sup> | Score <sup>d</sup> | Peptide Hits <sup>e</sup> | Peptides identified                                                                             |
|--------------------------------|-------------|-----------------------------------------------|-------------------------|---------|------|---------------------------|--------------------|---------------------------|-------------------------------------------------------------------------------------------------|
| <b>Lipid metabolism</b>        |             |                                               |                         |         |      |                           |                    |                           |                                                                                                 |
| 1572                           | IPI00197703 | Apolipoprotein A-I precursor                  | 4E-23                   | 30043   | 5.52 | 71%                       | 270                | 4                         | K.VVAEEFR.D<br>K.FGLYSDQMR.E<br>K.WNEEVEAYR.Q<br>K.DSGRDYVSQFESSTLGK.Q                          |
| 1271                           | IPI00210823 | 3-oxo-5-beta-steroid dehydrogenase            | 4- 6.4E-46              | 37354   | 6.18 | 54%                       | 498                | 4                         | K.SLGVSNFNR.R<br>R.HIDGAYVYR.N<br>R.IKENFQIFDFSLTK.E<br>K.YKPVTNQVEC*HPYFTQTK.L                 |
| 1510                           | IPI00231767 | Triosephosphate isomerase                     | 8.00E-25                | 26832   | 6.89 | 75%                       | 287                | 2                         | K.DLGATWVVLGHSER.R<br>K.LPADTEVVC*APPTAYIDFAR.Q                                                 |
| <b>Carbohydrate metabolism</b> |             |                                               |                         |         |      |                           |                    |                           |                                                                                                 |
| 1280                           | IPI00198717 | Malate dehydrogenase, cytoplasmic             | 6.4E-39                 | 36460   | 6.16 | 46%                       | 428                | 5                         | K.ENFSC*LTR.L<br>K.GEFITTVQQR.G<br>K.DLDVAVLVGSMR.R<br>K.FVEGLPINDFSR.E<br>K.SAPSIPKENFSC*LTR.L |
| 1121                           | IPI00360056 | Aldose 1-epimerase                            | 1.30E-11                | 37869   | 6.18 | 42%                       | 155                | 3                         | K.EYHLPINR.E<br>K.QPYFGAVVGR.V<br>R.HLQSYHIHGFDHNFCLK                                           |
| 1353                           | IPI00194324 | Pyruvate dehydrogenase component subunit beta | E1 3.2E-11              | 38957   | 6.2  | 34%                       | 151                | 2                         | R.IMEGPAFNFLDAPAVR.V<br>K.TYYMSAGLQPVPIVFR.G                                                    |

**Protein metabolism**

|      |             |                                                              |          |       |      |     |     |   |                                                                |
|------|-------------|--------------------------------------------------------------|----------|-------|------|-----|-----|---|----------------------------------------------------------------|
| 1273 | IPI00197900 | Translation elongation factor 1-<br>delta subunit (Fragment) | 2.00E-14 | 28748 | 4.86 | 49% | 183 | 3 | K.LVPVGYGIR.K<br>K.LVPVGYGIR.K<br>K.LVPVGYGIR.K                |
| 502  | IPI00515829 | Kininogen 1                                                  | 3.20E-20 | 47734 | 6.29 | 32% | 241 | 3 | K.HIGLVYSGMGPDYR.V<br>K.SILYDER.S<br>K.LAQQYYLVYQEPIPTAQLVQR.V |

**Amino acid and derivative metabolism**

|      |             |                                                          |          |        |      |     |     |   |                                                                                                                 |
|------|-------------|----------------------------------------------------------|----------|--------|------|-----|-----|---|-----------------------------------------------------------------------------------------------------------------|
| 37   | IPI00210644 | Carbamoyl-phosphate synthase,<br>mitochondrial precursor | 5.0E-14  | 164476 | 6.33 | 22% | 179 | 4 | K.SLFHYR.Q<br>R.GQNQPVLNITNR.Q<br>R.MC*HPSVDGFTPR.L<br>K.GILIGIQSFRPR.F                                         |
| 1743 | IPI00231963 | D-dopachrome decarboxylase                               | 1.0E-33  | 13125  | 6.09 | 79% | 376 | 5 | R.IPAGLENR.L<br>K.FLTEELSLDQDR.I<br>R.VSVTIRPGMTLLMNK.S<br>R.LC*AATATILDKPEDR.V<br>K.STEPC*AHLLISSIGVVGTAEQNR.S |
| 1708 | IPI00324380 | Transthyretin precursor                                  | 1.0E-10  | 15710  | 5.77 | 20% | 146 | 1 | K.ALGISPFHEYAEVVFTANDSGHR.H                                                                                     |
| 1168 | IPI00327518 | Arginase-1                                               | 1.6E-29  | 36481  | 6.51 | 62% | 334 | 3 | K.DIVYIGLR.D<br>K.VMEETFSYLLGR.K<br>R.DHGDALAFVDVPNDSPFQIVK.N                                                   |
| 564  | IPI00475676 | Delta-1-pyrroline-5-carboxylate<br>dehydrogenase         | 1.30E-08 | 61830  | 7.14 | 26% | 125 | 2 | K.STGSVVGQQPFGGAR.A<br>K.VANEPILAFTQGSPER.D                                                                     |
| 1400 | IPI00365297 | Agmatinase, mitochondrial<br>precursor                   | 4.00E-25 | 37963  | 6.71 | 32% | 290 | 4 | R.TLDPYR.Y<br>R.VVQIGIR.G<br>K.SLVPLMAEIR.Q<br>R.VADLGNVNVNLYNLQDSC*R.L                                         |

**Response to stimulus**

|     |             |                                   |  |         |       |      |     |     |   |                          |
|-----|-------------|-----------------------------------|--|---------|-------|------|-----|-----|---|--------------------------|
| 560 | IPI00231742 | Catalase                          |  | 0.0031  | 59719 | 7.07 | 22% | 71  | 1 | R.LGPNYLQIPVNCOPYR.A     |
| 527 | IPI00327469 | Alpha-2-HS-glycoprotein precursor |  | 3.2E-06 | 37958 | 6.05 | 21% | 101 | 1 | K.VGQPGDAGAAGPVAPLCPGR.V |

**Binding**

|      |             |                                     |         |          |       |      |     |     |   |                                                                                                              |
|------|-------------|-------------------------------------|---------|----------|-------|------|-----|-----|---|--------------------------------------------------------------------------------------------------------------|
| 543  | IPI00206624 | Glucose-regulated protein precursor | protein | 1.30E-40 | 72302 | 5.07 | 50% | 445 | 4 | K.SDIDEIVLVGGSTR.I<br>K.DNHLLGTFDLTGIPPAPR.G<br>R.ITPSYVAFTPEGER.L<br>K.VTHAVVTVPAYFNDAQR.Q                  |
| 1514 | IPI00230788 | Carbonic anhydrase 3                |         | 6.40E-43 | 29413 | 6.89 | 85% | 468 | 5 | R.VVFDDTFDR.S<br>R.SLFASAENEPVPLVGNWRPPQPIK.G<br>R.GGPLSGPYR.L<br>K.YAAELHLVHWNPK.Y<br>K.EAPFNHFDPSCLFPACR.D |

**Development**

|     |             |                                 |  |          |       |      |     |     |   |                                                                                                     |
|-----|-------------|---------------------------------|--|----------|-------|------|-----|-----|---|-----------------------------------------------------------------------------------------------------|
| 799 | IPI00389571 | Keratin, type II cytoskeletal 8 |  | 1.3e-042 | 53985 | 5.83 | 55% | 465 | 5 | K.LALDIEIATYR.K<br>R.LEGLTDEINFLR.Q<br>R.ATLEAAIADAEQRGELAVK.D<br>R.AQYEEIANR.S<br>R.LQAEIDALKGQR.A |
|-----|-------------|---------------------------------|--|----------|-------|------|-----|-----|---|-----------------------------------------------------------------------------------------------------|

**Unclassified**

|      |             |                                                |  |          |       |      |     |     |   |                                                                                                    |
|------|-------------|------------------------------------------------|--|----------|-------|------|-----|-----|---|----------------------------------------------------------------------------------------------------|
| 1662 | IPI00561017 | Prdx5 22 kDa protein                           |  | 6.40E-45 | 22256 | 8.54 | 55% | 488 | 4 | K.THLPGFVEQAGALK.A<br>K.GVLFGVPGAFTPGC*SK.T<br>K.ETDLLLDDSLVSLFGNR.R<br>K.GAQVVAC*LSVNDVFVTAEWGR.A |
| 1526 | IPI00760117 | Comt Isoform 2 of Catechol O-methyltransferase |  | 2.00E-10 | 24731 | 5.11 | 55% | 143 | 2 | R.LLQPGAR.L<br>R.EYSPSLVLELGAYC*GYS AVR.M                                                          |

|      |             |                                         |            |          |       |      |     |     |   |                                                                                                              |
|------|-------------|-----------------------------------------|------------|----------|-------|------|-----|-----|---|--------------------------------------------------------------------------------------------------------------|
| 1563 | IPI00392676 | Blvrb_predicted<br>reductase B          | biliverdin | 2.00E-19 | 22038 | 6.29 | 62% | 233 | 3 | K.IAIFGATGR.T<br>K.HDLGHFMLR.C<br>K.YVAVMPPHIGDQPLTGAYTVTLDGR.<br>G                                          |
| 1746 | IPI00205036 | Hemoglobin alpha 2 chain                |            | 3.20E-54 | 15275 | 8.45 | 96% | 581 | 5 | R.MFAAFPTTK.T<br>K.LRVDPVNFK.F<br>K.IGGHGGGEYGEEALQR.M<br>K.TYFSHIDVSPGSAQVK.A<br>K.AADHVEDLPGALSTLSDLHAHK.L |
| 1453 | IPI00231106 | 3-mercaptopyruvate<br>sulfurtransferase |            | 1.3E-36  | 32919 | 5.88 | 57% | 405 | 4 | R.FQGTQPEPR.D<br>R.AQPEHVISQGR.G<br>R.HIPGAAFFDIDR.C<br>R.AFGHHSVSLLDGGFR.Y                                  |

<sup>a</sup> Spot No. is the unique number of the position of the spot in the master gel.

<sup>b</sup> *p*-value ID is the best expectation value for the identified protein as calculated by Mascot.

<sup>c</sup> Amino acid sequence coverage for the identified protein.

<sup>d</sup> Score is the protein score based on combined mass and mass/mass spectrums.

<sup>e</sup> Peptide hits is the unique number of MS/MS spectrums which match to the trypsin peptide.
